1 **Live imaging reveals chromatin compaction transitions and dynamic transcriptional**  
2 **bursting during stem cell differentiation *in vivo***

3  
4 **Authors:** Dennis May<sup>1\*</sup>, Sangwon Yun<sup>1\*</sup>, David Gonzalez<sup>1</sup>, Sangbum Park<sup>1,2,3,4</sup>, Yanbo Chen<sup>1</sup>,  
5 Elizabeth Lathrop<sup>1</sup>, Biao Cai<sup>5</sup>, Tianchi Xin<sup>1</sup>, Hongyu Zhao<sup>1,5</sup>, Siyuan Wang<sup>1,6</sup>, Lauren E.  
6 Gonzalez<sup>1#</sup>, Katie Cockburn<sup>1,7#</sup>, Valentina Greco<sup>1,3#</sup>

7  
8  
9 **Affiliations:**

10  
11 <sup>1</sup>Department of Genetics, Yale University School of Medicine, New Haven, CT 06510, USA

12 <sup>2</sup>Institute for Quantitative Health Science & Engineering (IQ), Michigan State University, East Lansing, MI  
13 48824, USA

14 <sup>3</sup>Division of Dermatology, Department of Medicine, College of Human Medicine, Michigan State University,  
15 East Lansing, MI 48824, USA

16 <sup>4</sup>Department of Pharmacology and Toxicology, College of Human Medicine, Michigan State University, East  
17 Lansing, MI 48824, USA

18 <sup>5</sup>Department of Biostatistics, Yale University School of Public Health, New Haven, CT 06510, USA

19 <sup>6</sup>Department of Cell Biology, Yale University School of Medicine, New Haven, CT 06510, USA

20 <sup>7</sup>Department of Biochemistry and Rosalind & Morris Goodman Cancer Institute, McGill University, Montreal,  
21 QC, H3G 1Y6, Canada

22 <sup>8</sup>Departments of Cell Biology and Dermatology, Yale Stem Cell Center, Yale Cancer Center, Yale University  
23 School of Medicine, New Haven, CT 06510, USA

24  
25 \* These authors contributed equally.

26  
27 # Correspondence to: Lauren E. Gonzalez Email: [lauren.e.gonzalez@yale.edu](mailto:lauren.e.gonzalez@yale.edu), Katie Cockburn  
28 Email: [katie.cockburn@mcgill.ca](mailto:katie.cockburn@mcgill.ca), and Valentina Greco, Email: [valentina.greco@yale.edu](mailto:valentina.greco@yale.edu)

29  
30  
31  
32 **Abstract:** Stem cell differentiation requires dramatic changes in gene expression and global  
33 remodeling of chromatin architecture. How and when chromatin remodels relative to the  
34 transcriptional, behavioral, and morphological changes during differentiation remain unclear,  
35 particularly in an intact tissue context. Here, we develop a quantitative pipeline which leverages  
36 fluorescently-tagged histones and longitudinal imaging to track large-scale chromatin compaction  
37 changes within individual cells in a live mouse. Applying this pipeline to epidermal stem cells, we  
38 reveal that cell-to-cell chromatin compaction heterogeneity within the stem cell compartment  
39 emerges independent of cell cycle status, and instead is reflective of differentiation status.  
40 Chromatin compaction state gradually transitions over days as differentiating cells exit the stem

1 cell compartment. Moreover, establishing live imaging of *keratin-10* nascent RNA, which marks  
2 the onset of stem cell differentiation, we find that *keratin-10* transcription is highly dynamic and  
3 largely precedes the global chromatin compaction changes associated with differentiation.  
4 Together, these analyses reveal that stem cell differentiation involves dynamic transcriptional  
5 states and gradual chromatin rearrangement.

6

## 7 **Introduction**

8 Cellular identity is a composite of many features, including behavior, morphology, protein  
9 levels, and gene expression. All of these aspects are fundamentally shaped by the transcriptional  
10 program and therefore chromatin architecture of a cell. Recent technological advances have  
11 allowed the field to increasingly appreciate transcriptional heterogeneity within cell populations  
12 that were previously assumed to be homogeneous (Patel et al., 2014; Wang et al., 2020), and  
13 single-cell epigenetic profiling is beginning to reveal the extent of chromatin architecture  
14 heterogeneity within cell populations (Buenrostro et al., 2015; Finn et al., 2019; Jin et al., 2015;  
15 Lai et al., 2018)

16 The particular suite of genes expressed in a given cell is largely determined by nucleosome  
17 compaction in different region of the genome, where accessible (euchromatic) regions permit gene  
18 expression, and inaccessible (heterochromatic) regions largely prevent gene expression. During  
19 embryonic lineage specification, stem cell differentiation, and somatic cell reprogramming,  
20 chromatin architecture undergoes large-scale changes resulting in drastically different cell  
21 identities (Golkaram et al., 2017; Kurimoto et al., 2015; Oudelaar et al., 2020; Paulsen et al., 2019;  
22 Pelham-Webb et al., 2020). However, because chromatin architecture analyses, including those  
23 with single-cell resolution, typically rely on data captured at fixed timepoints, we lack an

1 understanding of how chromatin architecture progressively changes during cell identity transitions  
2 within a physiological setting.

3 Epidermal stem cell differentiation is an excellent model to understand the progressive  
4 nature of cell identity transitions. The epidermis is fueled by a basal layer of stem cells which are  
5 actively proliferating to maintain density, and the continual differentiation of cells delaminating  
6 and moving apically to build the outer layers of the skin barrier (**Supp Fig 1a**). Traditionally, cell  
7 identities within the epidermis have been distinguished by cell morphology, specific protein  
8 markers, and localization within the tissue.

9 Recently, single cell RNA-sequencing data has shown that the cell identity transition  
10 through epidermal differentiation is progressive and takes place over several days. Specifically,  
11 cells within the basal stem cell layer show global transcriptional changes associated with  
12 differentiation preceding exit from the basal layer (Aragona et al., 2020; Cockburn et al., 2021).  
13 Chromatin accessibility and the architecture of individual loci have been investigated in embryonic  
14 skin (Fan et al., 2018; Gdula et al., 2013; Mardaryev et al., 2014; Shue et al., 2020), but how and  
15 when chromatin changes relative to the transcriptional and morphological transitions of adult  
16 epidermal stem cell differentiation remains unknown.

17 Here, we leverage intravital imaging to observe and track global chromatin changes of  
18 individual stem cells within their homeostatic environment through time and cell fate transitions.  
19 By developing a quantitative pipeline to capture each cell's unique chromatin compaction state,  
20 we reveal extensive heterogeneity of global chromatin architecture within the epidermal stem cell  
21 population, as well as distinct chromatin compaction states of epidermal stem cells and their  
22 differentiated daughter cells. Tracking individual cells over time and using a reporter for  
23 differentiation status reveals that global chromatin compaction state reflects differentiation state,

1 beginning in the basal layer prior to exit from the stem cell compartment. We also show, through  
2 live imaging endogenous transcription at the earliest known stage of differentiation, that epidermal  
3 cells pass through heterogeneous and flexible transcriptional states as they progress towards their  
4 fully differentiated status. Together, this study reveals the chromatin compaction heterogeneity  
5 within a regenerative organ, incremental chromatin compaction remodeling through stem cell  
6 differentiation, and insight into how transcriptional dynamics of a key differentiation gene relate  
7 to cellular state transitions.

8

## 9 **Results**

### 10 Intravital imaging reveals cell cycle-independent heterogeneity in chromatin compaction across 11 the basal stem cell layer

12 To understand transitions in large-scale chromatin architecture as a function of cell identity,  
13 we developed a fluorescence-based system that allows visualization of chromatin compaction in  
14 single skin epidermal stem cells within their native tissue in live mice. This quantitative pipeline  
15 leverages fluorescently-tagged histone 2b where bright fluorescence indicates densely packed  
16 chromatin and dimmer fluorescence indicates loosely packed chromatin or chromatin-excluded  
17 compartments (Amiad-Pavlov et al., 2021; Kanda et al., 1998). Using the *keratin-14 histone2B-*  
18 *GFP (K14H2B-GFP)* allele, which is expressed in epidermal stem cells and their progeny, we first  
19 segmented the 3D volume of individual nuclei and extracted fluorescence intensity at each voxel  
20 from high-resolution, intravital imaging data (**Fig 1A and B Movie 1**). This complex, spatial  
21 dataset was then reduced to a unique intensity distribution profile by normalizing all voxels within  
22 the 3D volume and plotting them as a percentage of total nuclear volume (**Fig 1C**). The  
23 normalization also accounts for any variation in raw intensity values among different nuclei,

1 allowing for comparison among different cell populations and mice, irrespective of differences in  
2 mean intensity. Therefore, any changes in chromatin compaction profiles reflect the relative  
3 change in chromatin architecture intrinsic to the individual nucleus, that can therefore be compared  
4 to any other analyzed nuclei.

5 Applying this pipeline to intravital imaging data allowed us to quantify chromatin  
6 compaction within individual nuclei, among a population of stem cells, and between distinct cell  
7 identities based on cell location within the skin of a live mouse (**Supp fig 1B and 1C**).

8 The variable intensity of H2B-GFP indicates regions with different levels of chromatin  
9 compaction: highly-compressed, constitutively repressed chromocenters, loosely packed  
10 euchromatin, and nuclear periphery and nucleoli (**Fig 1C**). In fixed tissue staining, we  
11 recapitulated these chromatin compaction regions with Hoechst, as well as localization of known  
12 subnuclear compartments such as H3K9me3-positive chromocenters in the high H2B-GFP  
13 intensity regions, active RNA polymerase in the lower H2B-GFP intensity regions, and nucleoli  
14 in the very low H2B-GFP intensity regions (**Fig 1D, Supp fig 2A**). Applying the histone  
15 deacetylase inhibitor Trichostatin-A (TSA) abrogated these differences in H2B-GFP fluorescent  
16 intensity throughout individual nuclei and resulted in a shifted chromatin compaction curve  
17 compared to that of epidermal cells in the stem cell layer treated with the DMSO vehicle control  
18 (**Supp fig 2B and 2D**). Thus, the relative H2B-GFP intensity provides a visual readout of large-  
19 scale chromatin architecture (**Fig 1C**) and can be quantified to visualize the relative distribution of  
20 chromatin at different levels of compaction within individual nuclei irrespective of their volumes  
21 and mean H2B-GFP fluorescence intensities (**Fig 1B**).

22 Applying our chromatin compaction analysis to the basal stem cell layer, we noticed a clear  
23 heterogeneity within the stem cell population (**Fig 1E**). Previous studies have demonstrated

1 chromatin organization heterogeneity at the level of individual locus accessibility or TAD  
2 boundaries (Buenrostro et al., 2015; Finn et al., 2019; Jin et al., 2015; Lai et al., 2018), but given  
3 that our chromatin compaction analysis captures very large-scale aspects of global chromatin  
4 architecture, the degree of heterogeneity we observed in the basal stem cell layer was surprising.  
5 Cells within the stem cell layer are in a spread of cell cycle states at any given time, so we  
6 hypothesized that cells may differentially condense their chromatin throughout the interphase cell  
7 cycle, producing an overall heterogeneity in chromatin compaction states reflective of cell cycle  
8 status. At any given point, ~20% of the cells within the basal layer are in S/G2/M, and the  
9 remaining ~80% are in G1 (Hiratsuka et al., 2015). By inducing overexpression of the cell cycle  
10 inhibitor p27 (CDKN1b), we stalled the entire basal stem cell population in G1 (*K14rtTA; tetO-*  
11 *CDKN1b; K14H2B-GFP*) (**Fig 1F**). Intriguingly, reducing cell cycle heterogeneity did not  
12 significantly change the population-level chromatin compaction state of basal stem cells (**Fig 1G,**  
13 **1H**). To explore more subtle relationships between individual cell's chromatin compactions states,  
14 we used the dimensionality-reducing data visualization algorithm, PHATE (Moon et al., 2019). In  
15 this method, individual data points represent single cells, and the distance between points reflects  
16 the similarity of those cells' chromatin compaction profiles. In our data, the proportion of each  
17 nucleus' H2B-GFP intensity in each bin is analogous to each cell's number of reads for each gene  
18 in the more typical single cell RNA-sequencing application of PHATE (**Supp fig 2C**). Plotting the  
19 combined wild-type and mutant populations together revealed that they largely intermix both  
20 within the homeostatic cell cycle distribution (day 0) and through the cell cycle stall in G1 (day 1)  
21 (**Fig 1G' and 1H'**), which is in contrast to the largely separated populations of cells treated with  
22 TSA vs. DMSO (**Supp fig 2D'**). These data are consistent with previous studies which showed  
23 heterogeneity in chromatin architecture and accessibility independent of cell cycle differences

1 (Buenrostro et al., 2015, 2015; Finn et al., 2019; Lai et al., 2018). Together, these results show that  
 2 single cell chromatin compaction states in the basal stem cell layer are heterogeneous and  
 3 independent of interphase cell cycle status.

4

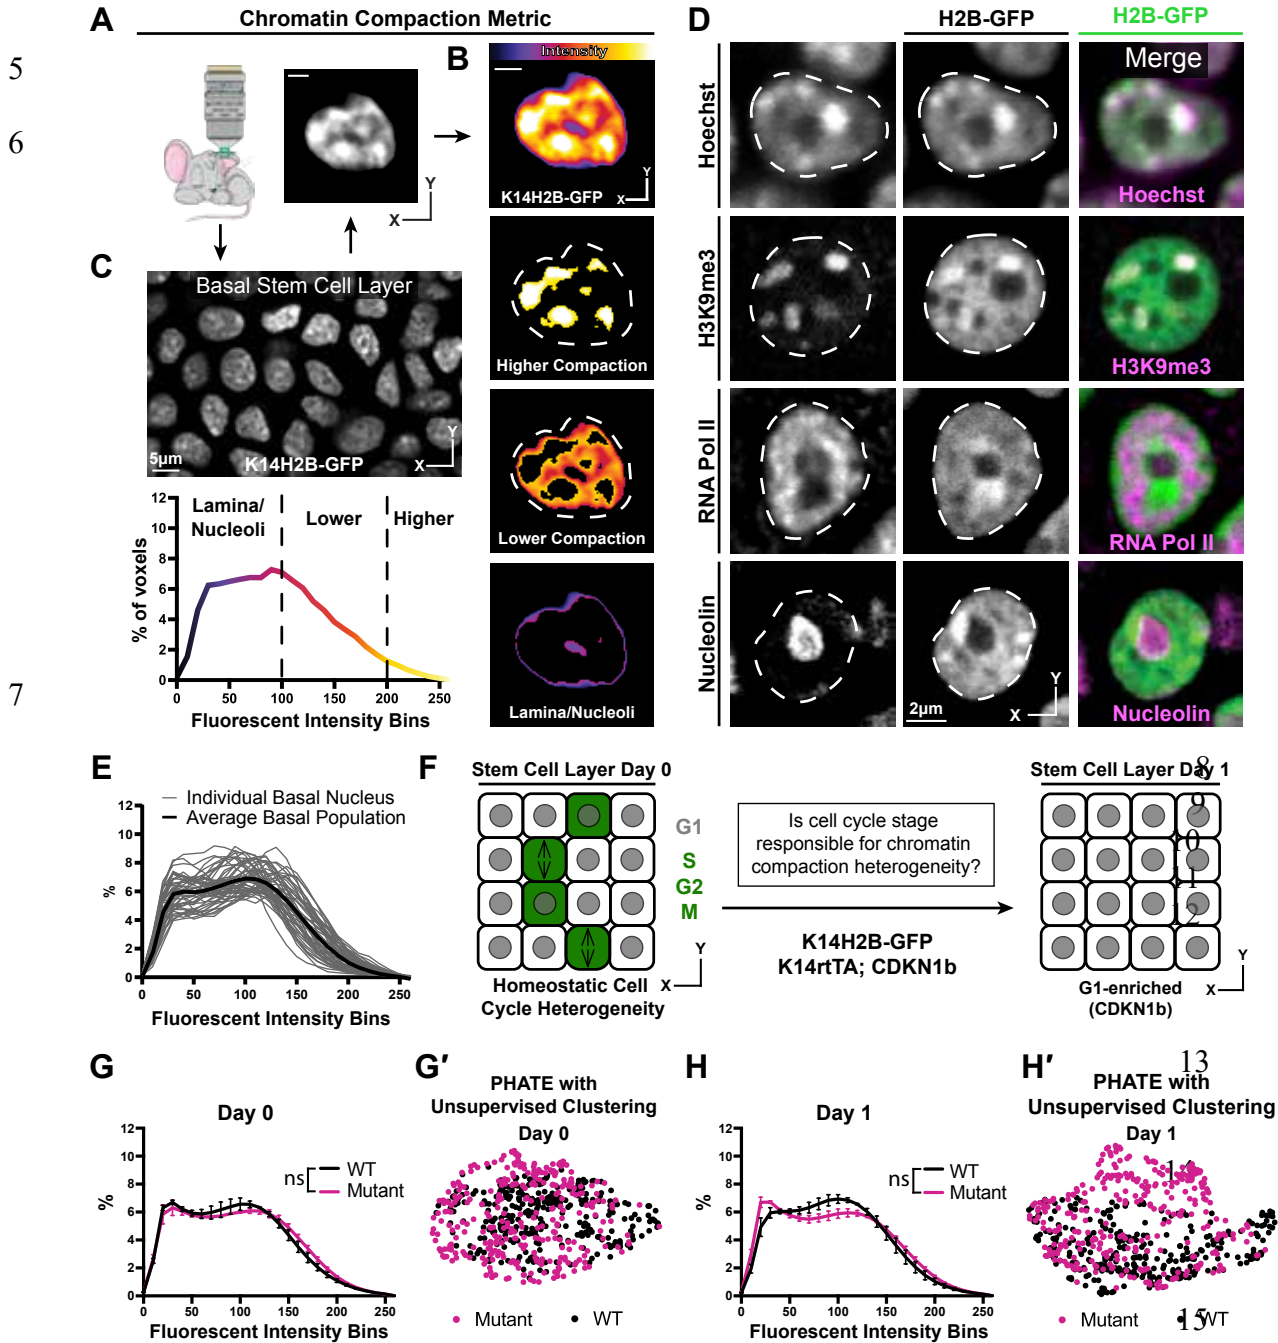

16



1 **Figure 1: Chromatin compaction state is heterogeneous and independent of interphase cell**  
2 **cycle. (A)** Representative XY view of the basal stem cell layer showing the *kertain14*-driven  
3 Histone2B-GFP allele in a live mouse. **(B)** A representative chromatin compaction profile of a  
4 single basal stem cell nucleus. Each voxel from the 3D volume of a nucleus was exported,  
5 normalized for mean fluorescent intensity, and plotted as a voxel percentage of volume against the  
6 0-256 intensity bins (methods). **(C)** A representative nucleus expressing H2B-GFP in a single  
7 optical slice, where the fluorescence intensity is displayed as a heatmap to illustrate the range of  
8 chromatin compaction within a nucleus. See Movie 1 for a 3D rendering of this nucleus. **(D)** Fixed  
9 epidermal tissue expressing H2B-GFP (green) and co-stained with Hoechst or various subnuclear  
10 compartment markers (magenta), demonstrating that high H2B-GFP fluorescence intensity  
11 correlates with heterochromatin (H3K9me3), lower H2B-GFP fluorescence intensity correlates  
12 with euchromatin (RNA Pol II), and the lowest H2B-GFP fluorescence intensity (in part) correlates  
13 with nucleoli (Nucleolin). The colocalization/overlap of these two fluorophores are indicated by  
14 the presence of white signal. Nuclear outlines are traced in white, dotted lines. **(E)** Chromatin  
15 compaction plots for 50 individual basal stem cells (grey lines) and the averaged population (bold,  
16 black line) revealing substantial heterogeneity of chromatin compaction states within the stem cell  
17 population. **(F)** Schematic of the genetic p27 (CDKN1b) overexpression system to stall cells in  
18 late G1 after 1 day of doxycycline administration. An increased N of 1260 basal nuclei across all  
19 mice (3 mutant and 3 wild-type) over day 0 and day 1 because only a subset of basal stem cells are  
20 within a non-G1 cell cycle phase at any given time. **(G)** Comparison of chromatin compaction  
21 states of wild-type (K14H2B-GFP; K14rtTA) and mutant (K14H2B-GFP; K14rtTA; tetO-  
22 CDKN1b) mice prior to doxycycline administration/induction on day 0. **(G')** PHATE plot of the  
23 same wild-type and mutant cells from panel (G) on day 0 showing intermixed populations. **(H)**  
24 Comparison of chromatin compaction states of wild-type (K14H2B-GFP; K14rtTA) and mutant  
25 (K14H2B-GFP; K14rtTA; tetO-CDKN1b) mice one day post doxycycline induction and stalling  
26 of the cell cycle in late G1 showing non-significant changes between wild-type and mutant  
27 populations. **(H')** PHATE plot of the same wild-type and mutant cells from panel (H) on day 1  
28 after CDKN1b induction showing largely intermixed populations.

29  
30

### 31 Differentiation status of epidermal cells dictates chromatin compaction state

32 The epidermis is a highly-regenerative organ involving the continual differentiation of cells  
33 from the basal stem cell layer to form the functional barrier of our skin. Cells within the stem cell  
34 layer will continually alter their transcriptome, delaminate from the stem cell compartment, and  
35 move apically/outward to form the overlaying differentiated layer (called spinous) over the course  
36 of 3-4 days (Cockburn et al., 2021; Mesa et al., 2018) (**Fig 2A**). Previous studies have  
37 demonstrated that basal stem cells and differentiated spinous cells have different nuclear volumes  
38 and numbers of pericentromeric clusters (Gdula et al., 2013). With live imaging of H2B-GFP, we



1 observe additional qualitative differences in chromatin architecture between these two  
2 populations; for example, differentiated spinous cells have a higher number of compact, bright  
3 chromocenters, and overall flatter nuclei (**Fig 2B**). By applying our chromatin compaction analysis  
4 to these two different cell populations, we observed that they have distinct chromatin compaction  
5 profiles, where the compaction state of differentiated cells was shifted toward lower fluorescent  
6 intensity bins (**Fig 2C**). As the quantitative pipeline allows for comparison between nuclei  
7 irrespective of differences in mean fluorescent intensity values, the shift left for differentiated cells  
8 implies a relative increase in very low-intensity regions such as the nuclear lamina and nucleoli,  
9 with a relative decrease in euchromatic and heterochromatin regions (**Supp fig 1B**).

10 To better understand how differentiation affects chromatin compaction state, we  
11 genetically knocked out one copy of *Serum Response Factor* (SRF) in the epidermis of adult mice  
12 (*K14H2B-GFP; SRF<sup>f/+</sup>; K14CreER; LSL-tdTomato*) (**Supp fig 3A**). SRF is a transcription factor  
13 which helps establish proper cell identity in the epidermis, contributing both to embryonic skin  
14 stratification and proper stem cell differentiation in the adult mouse epidermis (Lin et al., 2013;  
15 Verdoni et al., 2010). At 6 days post-recombination, the loss of SRF caused a transcriptional  
16 identity shift in the skin; expression of the basal stem cell marker Keratin-14 was no longer  
17 restricted to the basal stem cell layer, despite grossly normal epidermis organization (**Fig 2D, Supp**  
18 **fig 3B**). In both SRF heterozygous and wild type control mice, the chromatin compaction states in  
19 basal and spinous cells were distinct on day 0. By day 6, the differentiated, spinous population's  
20 chromatin compaction was more basal like in the SRF heterozygous mice, while the WT controls  
21 maintained distinct chromatin compaction profiles between the cell identities (**Fig 2E**). In  
22 particular, the chromatin compaction state of spinous differentiated cells shifted towards the  
23 chromatin compaction state of basal stem cells, reflecting the expansion of Keratin-14 expression

1 into the spinous layer and the breakdown of transcriptome identity between the two cell  
 2 populations. Importantly, these data also demonstrate that chromatin compaction changes can be  
 3 reflective of changes in transcriptional program and cell identity, even prior to extensive tissue  
 4 phenotypes.

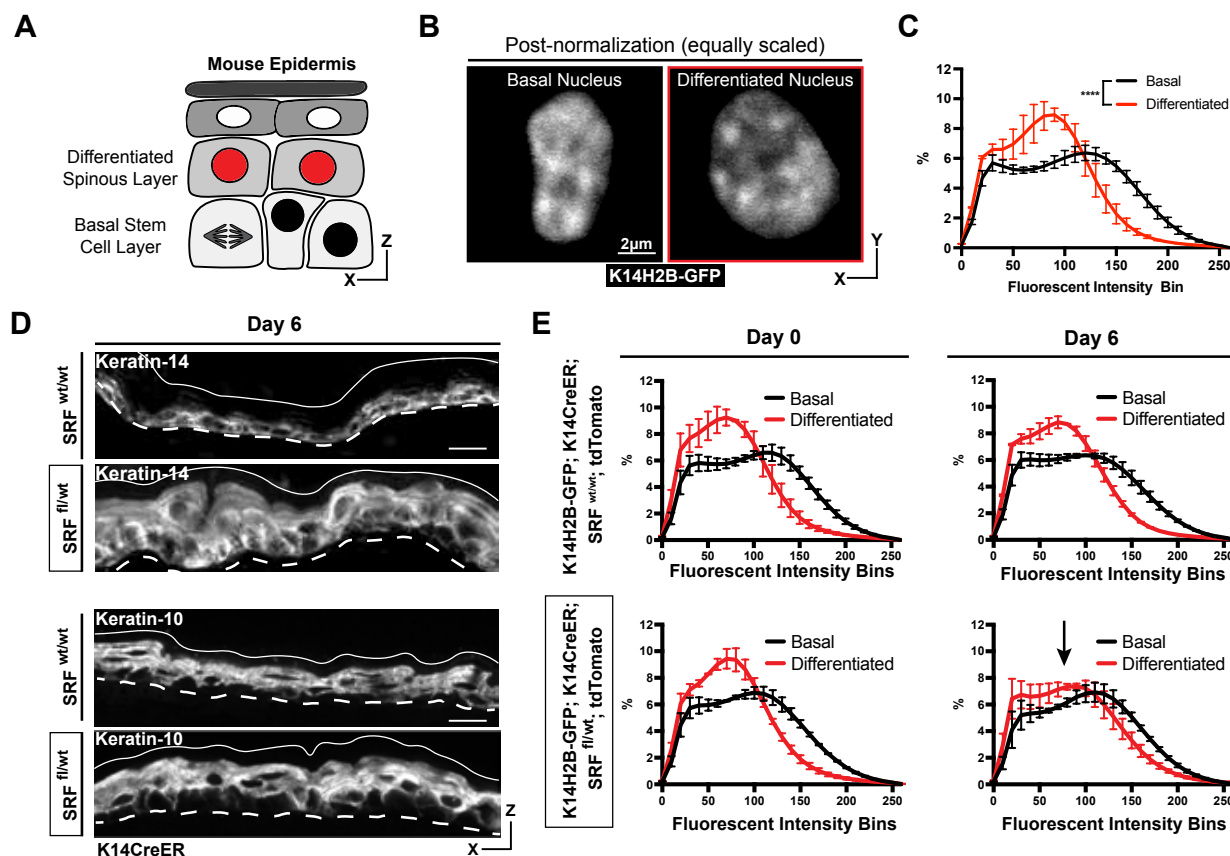

5 **Figure 2: Chromatin compaction state changes through differentiation state. (A)** XZ  
 6 schematic of the epidermis. The basal stem cell layer is shown with black nuclei and the  
 7 differentiated (spinous) layer shown apical with red nuclei. **(B)** Representative crops of individual  
 8 nuclei from the basal and differentiated populations scaled identically in the first two panels, and  
 9 scaled individually in the third to better show the different chromatin compaction states between  
 10 cell identities. H2B-GFP signal in white. **(C)** Chromatin compaction profiles of averaged  
 11 populations of cells from the basal stem cell and differentiated layers showing significant  
 12 differences in chromatin plots. N = 150 basal and 90 spinous cells across 3 mice. **(D)** Fixed, XZ  
 13 tissue slices from SRF<sup>wt/wt</sup> and SRF<sup>fl/wt</sup> mice day 6 after tamoxifen recombination. The basal stem  
 14 cell marker, Keratin-14, can be seen expanded into differentiated layers, and the differentiated  
 15 marker, Keratin-10, can be seen localized correctly despite a thickened overall epidermis. **(E)**  
 16 Chromatin compaction profiles for wild-type (SRF<sup>wt/wt</sup>; K14CreER; K14H2B-GFP; tdTomato)  
 17 and mutant (SRF<sup>fl/wt</sup>; K14CreER; K14H2B-GFP; tdTomato) mice on day 0 and 6 after tamoxifen  
 18 recombination. Black arrow in SRF<sup>fl/wt</sup> day 6 denotes that significant change in spinous cell  
 19 chromatin compaction profile. N = 150 basal and 90 spinous cells across 3 mice per day.

1 Basal cell chromatin compaction is stable over hours, but transitions through differentiation over  
2 days

3       Because we observed that chromatin is differentially compacted and organized between  
4 the basal stem cell and differentiated (spinous) layer above, we hypothesized that chromatin  
5 architecture would reorganize at a specific transition point during stem cell differentiation. To test  
6 this hypothesis, we began by analyzing chromatin compaction from three-hour timelapse imaging  
7 of *K14H2B-GFP* mice. Visually, chromatin compaction in cells in the basal stem cell layer was  
8 relatively stable over this time. High H2B-GFP density regions appeared to move only slightly,  
9 and chromatin compaction profiles at the beginning, middle, and end of these three-hour time  
10 lapses exhibited no significant change at the individual cell or population level (**Fig 3A and A'**,  
11 **Supp fig 4A**). These findings demonstrated that among these heterogeneous basal stem cells, the  
12 chromatin compaction state of each cell is stable over hours.

13       We next wondered whether the transition in chromatin compaction occurs slightly later  
14 during differentiation in cells actively delaminating, located in between the basal and spinous layer  
15 (Cockburn et al., 2021) (**Supp Fig 4B**). Strikingly, we noticed that the chromatin of these cells  
16 spins over the course of the timelapse (**Fig 3B, Movie 2**). The chromatin spinning was observed  
17 in all timelapses obtained under homeostatic conditions. Surprisingly, even in such a dramatic and  
18 dynamic nucleus, chromatin compaction was maintained through spinning with no significant  
19 changes in chromatin compaction taking place (**Fig 3B'**). Notably, though, the chromatin  
20 compaction state of these actively delaminating cells was markedly different from the chromatin  
21 compaction state of basal cells (compare **3B'** to **3A'**), and appeared to be an intermediate  
22 differentiation state between basal and spinous cells. Overall, these timelapse data suggest the

1 transition in chromatin compaction state during epidermal differentiation occurs over days, not  
2 hours, and is already in progress during basal cell delamination.

3 To test this hypothesis, we tracked a population of cells in the basal stem cell layer over  
4 four days in a live mouse (**Fig 3C**). By doing so, we sought to understand when and how quickly  
5 chromatin compaction changes were taking place, as well as confirming that the cells progressively  
6 transition between the chromatin states seen in Fig 2B and 2C. This population increased their  
7 average minimum distance from collagen from day 1 to day 4, reflecting that a portion of these  
8 cells were differentiating and moving apically into the spinous layer of the epidermis (**Fig 3C and**  
9 **3D, Supp fig 5A**). After tracking all cells over this time period, we binned nuclei into groups  
10 determined by their minimum distance to collagen to quantitatively measure the delamination  
11 process. When the chromatin compaction analysis was applied to these populations, we observed  
12 a gradual and directional change in chromatin compaction state as cells moved farther from  
13 collagen and moved into the spinus layer (**Fig 3E**). Together, our results indicate that chromatin  
14 compaction remodels slowly over days concomitant with differentiation and delamination.

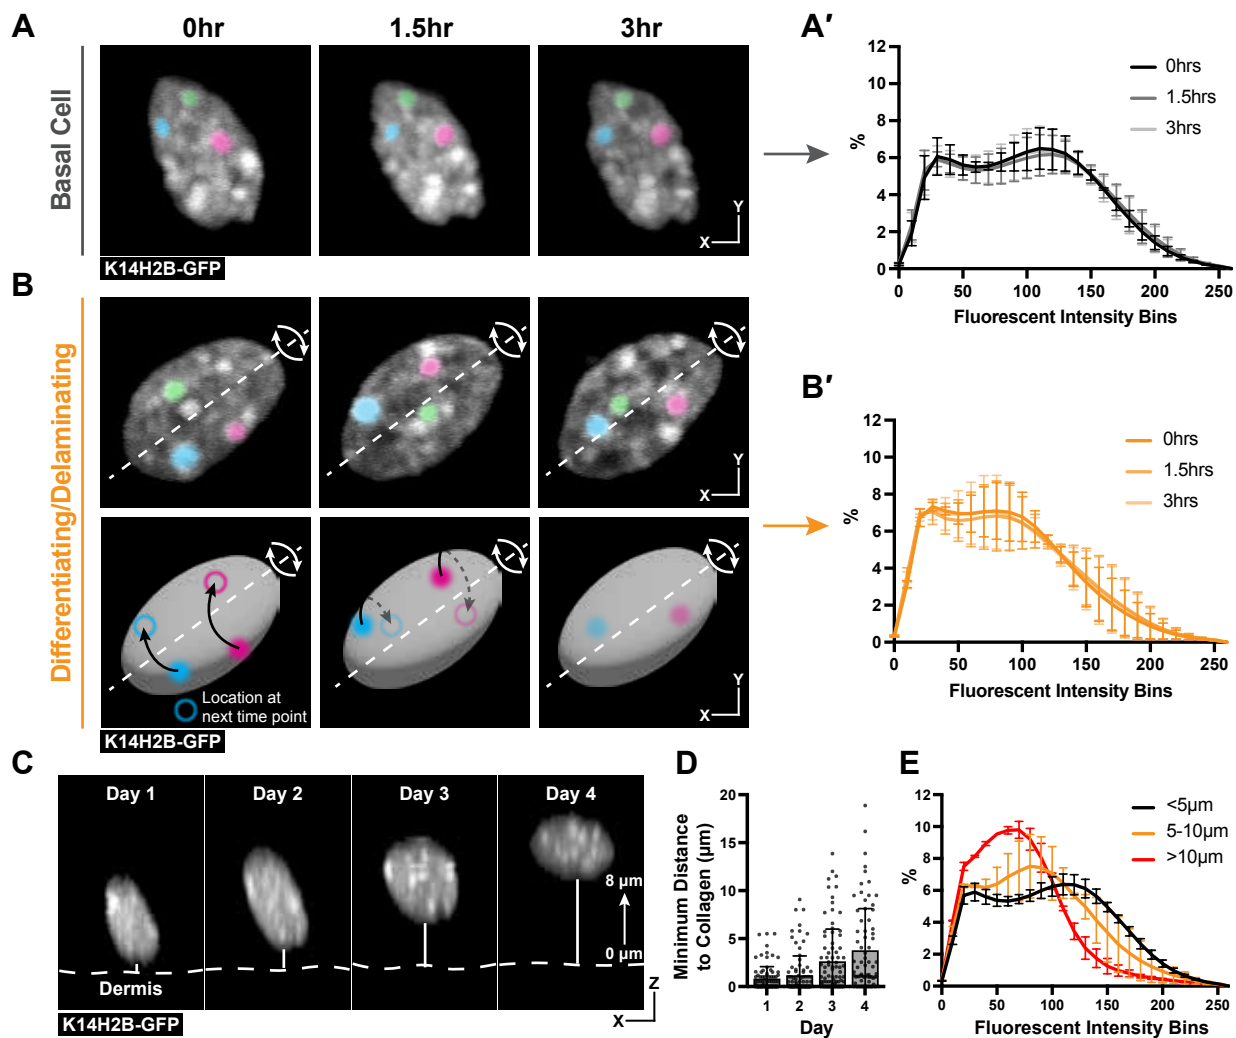

1 **Figure 3: Chromatin compaction is stable over hours and progressively changes over days.**  
2 (A) Time lapse imaging data of a single nucleus crop at 0, 1.5, and 3-hour time points. H2B-GFP  
3 fluorescent signal is shown in white. Three, high-intensity chromocenters were chosen and pseudo-  
4 colored blue, green, and pink to demonstrate their static nature over the 3 hours. (A') Chromatin  
5 compaction profiles for cells in the basal stem cell layer at the 0, 1.5, and 3-hour time points  
6 showing no significant change over 3 hours. N = 150 basal cells across 3 mice. (B) Same as in (A)  
7 but cells actively delaminating out of the basal stem cell layer, exhibiting rolling nuclei. The axis  
8 of rotation is shown in the white dotted line, with the rotational direction shown in white arrows  
9 around that axis. Three, high-intensity chromocenters were chosen and pseudo-colored blue, green,  
10 and pink to demonstrate the dynamic spinning taking place, but the positional stability of global  
11 chromatin organization relative to itself. A cartoon (below) of the same nucleus to better visualize  
12 the rotation and orientation over the 3 hours with the blue and pink pseudocolored chromocenters  
13 tracked through time. Black arrows indicate where the chromocenter will move to in the next time  
14 point (hollow circle), dotted black arrow indicates rotation around the backside of the nucleus. (B')  
15 Chromatin compaction profiles for cells with spinning chromatin (actively delaminating cells)  
16 showing no significant change over 3 hours. N = 146 spinning/delaminating cells over 3 mice. (C)  
17 XZ crops of the same nucleus tracked within the tissue over 4 days. Representative example of a

1 differentiating cell over this time period. Bold, dotted white line denotes the epidermal/dermal.  
2 Solid, thin white line shows the minimum distance from collagen quantified in panel (D). H2B-  
3 GFP fluorescent signal shown in white. **(D)** Minimum distance from collagen for a randomly  
4 selected population of basal cells on day 1, some of which differentiated and moved apically by  
5 day 4, while others remained basally located. **(E)** Chromatin compaction profiles of nuclei within  
6 the tracked population binned as distance from collagen showing the direct transition in chromatin  
7 compaction profiles through differentiation. N = 150 basal stem cells tracked over 4 days from 3  
8 mice.  
9

10 Chromatin compaction state begins to transition within the basal stem cell layer as differentiation  
11 initiates

12 The observation that delaminating basal cells had chromatin compaction states similar to  
13 differentiated spinous cells (**Fig 3B-B'**) made us wonder whether chromatin reorganization began  
14 while cells were still within the basal stem cell layer. This model could also explain the  
15 heterogeneity of chromatin compaction states within the basal layer (**Fig 1E**). Indeed, previous  
16 studies have shown that basal stem cell differentiation involves cumulative transcriptional changes  
17 that begin prior to delamination (Aragona et al., 2020; Cockburn et al., 2021). We wondered if the  
18 chromatin compaction state of basal cells that are committed to differentiation differs from basal  
19 cells that are not.

20 To test this hypothesis, we genetically labelled the cells of the basal stem cell layer with an  
21 early marker of differentiation: expression of *Keratin-10* (*K10rtTA*; *tetO-Cre*; *tdTomato*;  
22 *K14H2B-GFP*) (Cockburn et al., 2021; Muroyama and Lechler, 2017) (**Fig 4A and 4B, Supp fig**  
23 **5B**). This population represents a relatively large portion of the basal stem cell layer (~40%), and  
24 expression of the K10 reporter has been shown to define a point of commitment for delamination  
25 (Cockburn et al., 2021). Basal cells were sampled with respect to K10 reporter (tdTomato)  
26 expression, and then binned into K10+ and K10- groups. Remarkably, even this relatively small  
27 difference in cell states (all a part of the basal stem cell layer) had significantly different chromatin

1 compaction profiles (**Fig 4C**). In addition, the cells positive for the K10 reporter adopted an  
2 intermediate chromatin compaction profile which was shifted towards that of the fully  
3 differentiated cells in Fig 2C and delaminating/differentiating cells in Fig 3B'. These data highlight  
4 that basal stem cells initiate global chromatin changes coinciding with delamination and exit from  
5 the stem cell compartment.

6 Applying the PHATE analysis and an unsupervised Louvain clustering algorithm to this  
7 basal stem cell dataset (including both K10- and K10+ cells), five distinct clusters emerged (**Fig**  
8 **4D**). The chromatin compaction profiles of the cells in the five clusters showed an entire spread of  
9 curves from most “basal-like” (cluster 1) to nearly fully differentiated (cluster 5) (**Fig 4D'**),  
10 reflecting the overall differentiation trajectory of chromatin compaction states. Together with the  
11 shape of the PHATE map itself, we noticed that the left and right sides (clusters 1 and 5) of the  
12 map seemed to narrow and pinch together, implying more similar chromatin compaction states  
13 among cells at the beginning and end of this trajectory than among the cells in the middle of the  
14 trajectory (clusters 2-4) (**Fig 4D**). Because these maps were derived from the K10 reporter dataset,  
15 we were able to overlay each cell's K10 status onto the PHATE maps (**Fig 4E**). The distribution  
16 of K10+ and K10- cells within the PHATE map clusters (**Fig 4E'**) reinforced the directionality of  
17 chromatin compaction changes indicated in Fig 4D'. Together, these data show that changes in  
18 chromatin compaction coincides with stem cell commitment to differentiation.



1

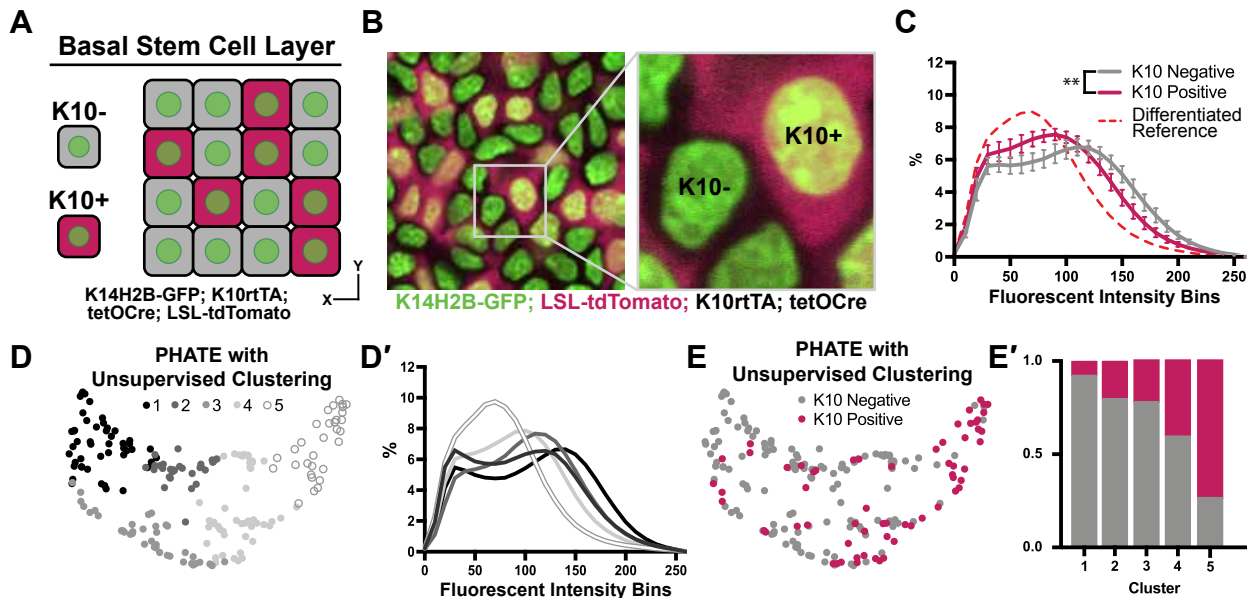

2

3 **Figure 4: Chromatin compaction changes precede differentiation.** (A) XY schematic of  
 4 genetic system (K14H2B-GFP; K10rtTA; tetO-Cre; tdTomato) allowing visualization of actively  
 5 differentiating cells still within the basal stem cell layer (expressing differentiation-associated  
 6 *keratin-10* gene). *Keratin-10* positive cells indicated with red cytosol. (B) Representative XY crop  
 7 of the basal stem cell layer showing *keratin-10* negative (no tdTomato signal) and *keratin-10*  
 8 positive cells (tdTomato in cytosol) with a cropped inset on the right. (C) Chromatin compaction  
 9 profiles comparing K10 status (tdTomato on/off) in basal stem cells showing significant  
 10 differences in chromatin compaction between groups. A differentiated reference line is shown by  
 11 the dotted, red curve. Averaged K10+ cells shown in pink and averaged K10- cells shown in grey.  
 12 N=187 K10- nuclei and N=132 K10+ nuclei from 3 mice. Statistical comparisons made between  
 13 histogram groups,  $p < 0.01$ . (D) PHATE plot of data from (C). Louvain clustering results are  
 14 projected onto the PHATE plot. Each dot represents one nucleus profile, and the distance between  
 15 dots represents the similarity in chromatin compaction profile. (D') Chromatin compaction profiles  
 16 of the averaged clusters identified through Louvain clustering in (D) elucidating directionality in  
 17 the clustering from a more basal curve to a more differentiated curve. (E) The same  
 18 PHATE/clustering dataset as in (D) with overlaid K10 status (on/off) again demonstrating  
 19 directionality in the PHATE map. (E') The ratio of K10 positive (red) and negative (grey) in each  
 20 of the Louvain clusters.

21

22

23

1 *Dynamic Keratin-10 expression precedes global chromatin compaction changes in differentiating*  
2 *basal stem cells*

3 Intrigued by how the differentiation trajectory seemed to be reflected in chromatin  
4 compaction states, we wanted to more specifically understand the relationship between global  
5 chromatin compaction state and transcription at the *keratin-10* locus. To do so, we used the  
6 MS2/MCP genetic system to visualize *keratin-10* transcripts in real time. We knocked in the MS2  
7 cassette (24x repeats of the MS2 stem loop sequence) after the stop codon of the *keratin-10* locus,  
8 and then crossed this mouse line to the MCP-GFP reporter mouse (Lionnet et al., 2011) and  
9 TIGRE-K14-H2B-mCherry (methods). MCP-GFP binds the MS2 stem loops, and this happens as  
10 soon as *keratin-10-MS* is transcribed. Thus, these mice (*Keratin-10MS2/+; MCP-GFP/+; TIGRE-*  
11 *K14-H2B-mCherry*) allowed us to visualize not only chromatin architecture through mCherry-  
12 tagged H2B, but also *in vivo* transcription of an endogenous allele through a GFP-positive punctum  
13 in the nucleus (**Fig 5A**). Importantly, while both the *Keratin-10-MS2/MCP-GFP* transcription  
14 reporter and the K10rtTA reporter in Fig 4 will capture cells that have been stably expressing  
15 *keratin-10* for some time, the transcription reporter can capture cells at an earlier stage of *keratin-*  
16 *10* expression compared to the K10rtTA reporter, which relies on multiple successive steps of gene  
17 expression, translation, and recombination.

18 Imaging the epidermis of these mice confirmed that differentiated spinous cells had active  
19 transcription of *keratin-10*, and only a subset of cells in the basal stem cell layer had active *keratin-*  
20 *10* transcription at any given time (**Fig 5B, 5E**), which is consistent with previous characterizations  
21 of Keratin-10 protein expression patterns (Braun et al., 2003; Doupé et al., 2010; Schweizer et al.,  
22 1984). To further validate that MCP-GFP puncta represent active *keratin-10* transcription at its  
23 locus, we next sought to resolve the local chromatin environment at the *keratin-10* locus during

1 active transcription. To do so, all H2B-mCherry fluorescence voxels within the nuclear surface of  
2 MCP-GFP puncta-containing basal stem cells were normalized as previously described, and those  
3 voxels that overlapped with the surface of MCP-GFP signal were extracted, enabling a quantitative  
4 visualization of the H2B-mCherry fluorescence within the local chromatin environment of *keratin-*  
5 *10* transcription. This analysis revealed that *keratin-10* transcription primarily occurred within  
6 loosely packed euchromatic regions of the nucleus (**Fig 5C and 5D, Supp fig 5D**), as expected.  
7 Interestingly, cells in the basal layer displayed three different reporter localization patterns: no  
8 transcription of *keratin-10* (no green punctum in nucleus), active transcription of *keratin-10* (bright  
9 punctum in nucleus), and multiple, dimmer MCP-GFP puncta in the cytosol without active  
10 transcription of *keratin-10* (no nuclear punctum) (**Fig 5B**). This last group led us to believe  
11 transcription of *keratin-10* might be quite dynamic, with kinetics in the range of the half-life of the  
12 *keratin-10* mRNA itself, likely minutes to hours (Dar et al., 2012; Suter et al., 2011). To understand  
13 possible *keratin-10* transcription dynamics, we imaged *Keratin10-MS2/+; MCP-GFP/+;*  
14 *K14H2B-mCherry* mice over the course of one hour. Intriguingly, of the cells actively transcribing  
15 *keratin-10*, about 40% sustain *keratin-10* transcription with no notable change in fluorescence  
16 intensity, but about 60% displayed dynamic transcription over the timelapse – they turned *keratin-*  
17 *10* on or turned *keratin-10* off during the hour imaged (**Fig 5F and 5G**). This pattern is consistent  
18 with most genes being transcribed in “bursts” lasting less than one hour (Bothma et al., 2014;  
19 Chubb et al., 2006; Dar et al., 2012; Fritzscht et al., 2018; Suter et al., 2011). To determine the  
20 perdurance of transcriptional dynamics, we performed timelapse imaging of the same exact cells  
21 24 hours later. We observed that only a subset of cells displayed the same transcriptional behaviors  
22 between the two days – approximately 40% of *keratin-10* “on” cells were “on” the next day, while  
23 roughly 60% *keratin-10* “dynamic” cells were “dynamic” the next day. The remaining cells which

1 had been transcribing *keratin-10* on day 1 displayed a variety of different *keratin-10* transcriptional  
2 behaviors on day 2, including an absence of active transcription entirely (**Fig 5H**). Collectively,  
3 these data indicate that *keratin-10* transcriptional activity in basal stem cells is flexibly dynamic.

4 To understand how *keratin-10* transcriptional status relates to chromatin compaction states,  
5 we used the H2B-mCherry signal to perform chromatin compaction analysis. This analysis  
6 revealed that cells actively transcribing *keratin-10* had chromatin compaction states similar to that  
7 of cells not transcribing *keratin-10* (**Fig 5I and 5I'**, **Supp fig 5C**), though they trended towards  
8 the chromatin compaction state of cells expressing the K10rtTA reporter (compare to **Fig 5I** to **Fig**  
9 **4C**). Because the cells marked by the *Keratin-10-MS2/MCP-GFP* transcription reporter include  
10 those at the very earliest step of differentiation, this result suggests that chromatin compaction  
11 changes either have not yet occurred or are just beginning to occur when *keratin-10* transcription  
12 is initiated.

13 Finally, we hypothesized that *keratin-10* “on” cells were further advanced in their cell  
14 identity transition toward differentiation than *keratin-10* “dynamic” ones. Intriguingly, the  
15 chromatin compaction signature of *keratin-10* “on” compared to *keratin-10* “dynamic” cells were  
16 extremely close to one another (**Fig 5J**) suggesting that the cells displaying these different *keratin-*  
17 *10* transcriptional dynamics in fact co-exist within extremely similar cell identity states.

18 Altogether, these results reveal that the initiation of *keratin-10* transcription, which  
19 represents one of the first steps of a basal stem cell towards differentiation, is highly dynamic and  
20 that significant chromatin remodeling occurs after transcription initiation of *keratin-10*.

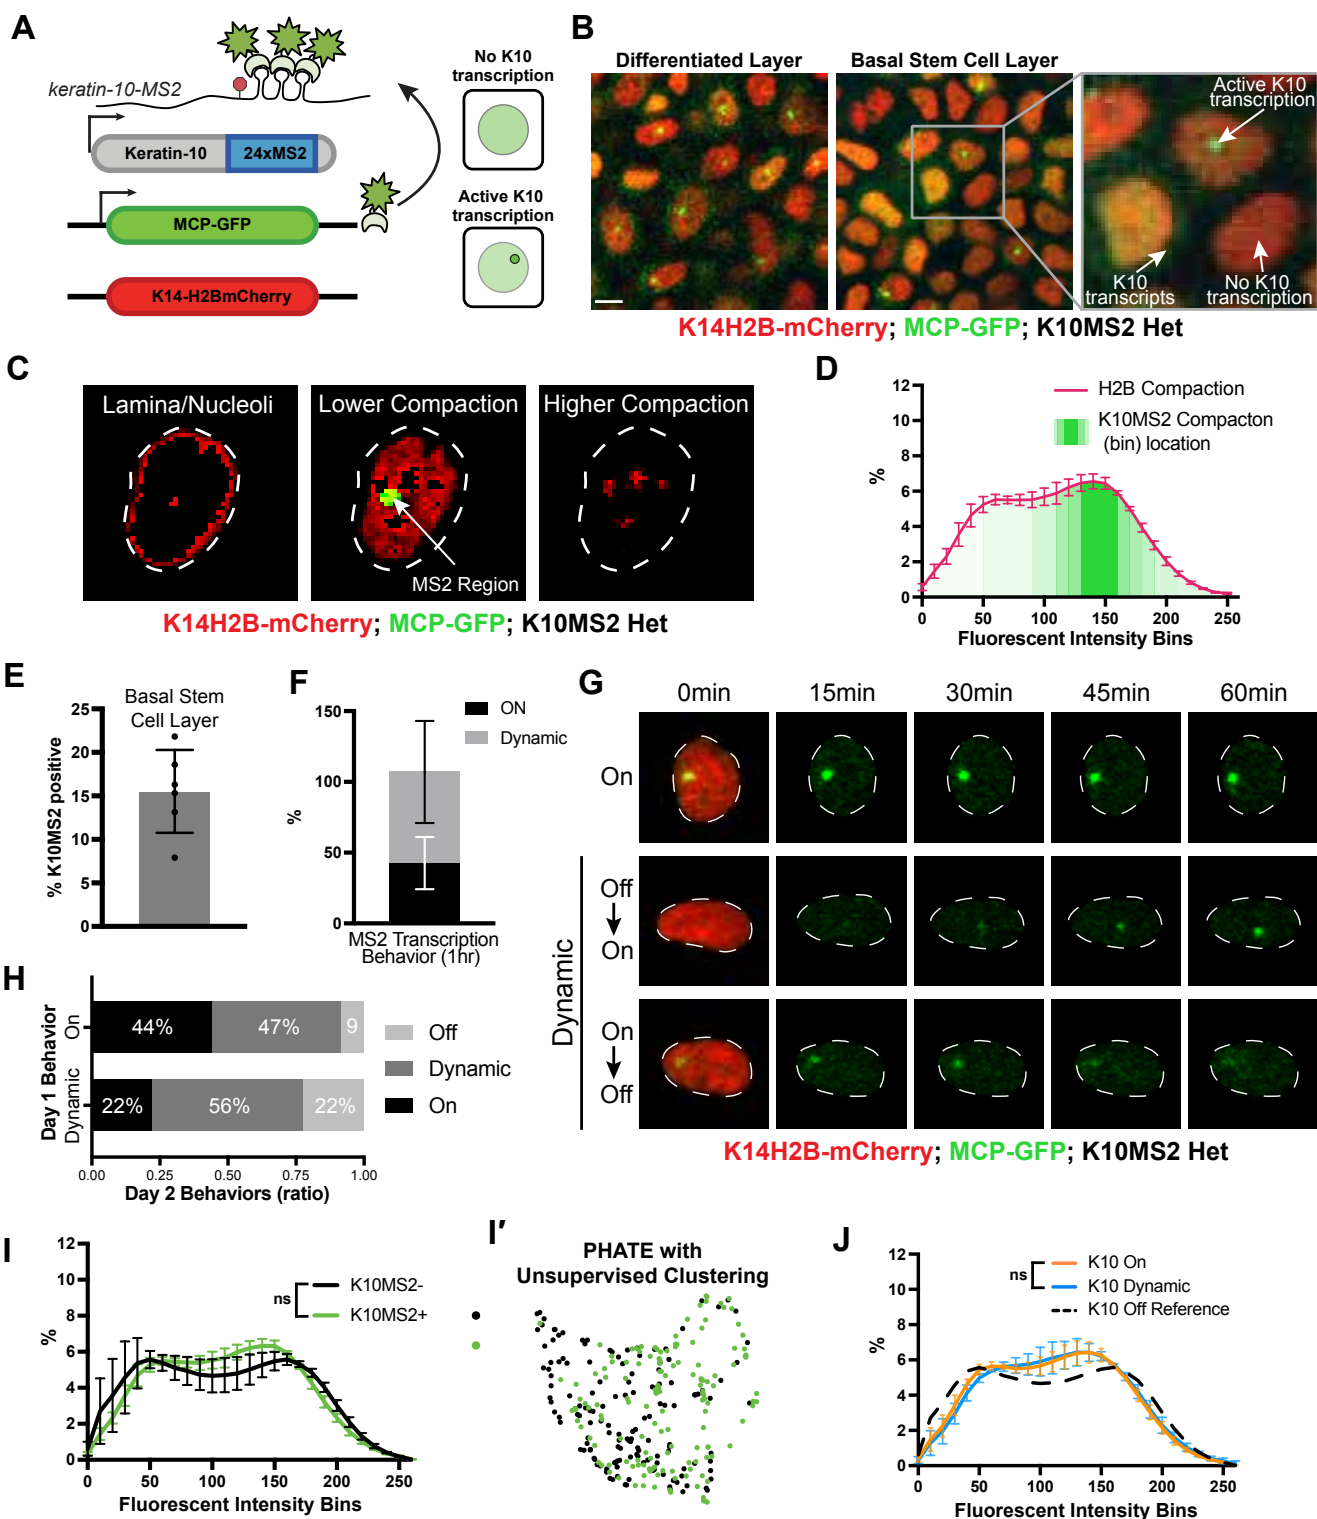

1

2

1 **Figure 5: *in vivo* transcription of *keratin-10* precedes genome architecture changes through**  
2 **differentiation.** (A) Visual schematic of the MCP/MS2 system allowing visualization of a targeted  
3 gene under endogenous regulation. 24X MS2 repeats were knocked into the 3'UTR of the *keratin-*  
4 *10* locus and chromatin compaction visualized with K14H2B-mCherry. Presence of nuclear MCP  
5 punctum indicates active *keratin-10* transcription, where lack of signal indicates no active  
6 transcription at that locus. (B) Representative crops of the differentiated spinous layer (left) and  
7 basal stem cell layer (right), as well as magnified inset showing active site of *keratin-10*  
8 transcription, and nascent transcripts in cytosol awaiting translation. Scale bar=5 $\mu$ m. (C)  
9 Representative image of a nucleus separated into the same chromatin compaction regions as in Fig  
10 1C. Active transcription of *keratin-10* can be seen within the lower compaction region from bins  
11 100-200. (D) Chromatin compaction profile of averaged H2B-mCherry basal stem cells (red line)  
12 and the fluorescent bin location of *keratin-10* transcription punctum (green, semi-translucent bars).  
13 N = 150 *keratin-10* transcribing basal stem cells across 3 mice. Surfaced MCP signal was used to  
14 identify the mCherry fluorescent intensity bins that *keratin-10* transcription occurred, and then  
15 plotted as increasing green transparency. (E) Populational percentage of active *keratin-10*  
16 transcription in the basal stem cell layer in K10MS2 Het mice. N = 3 100 x 100um regions  
17 quantified over 3 mice. (F) Percentages of *keratin-10* dynamics within the *keratin-10* positive  
18 basal stem cell layer over 1 hour. ~40% of basal stem cells actively expressing *keratin-10* remained  
19 on throughout the 1-hour timelapse, while ~60% had dynamic transcriptional behaviors. (G)  
20 Representative crops of individual basal stem cell nuclei exhibiting different *keratin-10*  
21 transcriptional dynamics over the course of 1 hour. H2B-mCherry signal can be seen in red in the  
22 first time point for reference, and *keratin-10* transcription punctum in green in all time points.  
23 White, dotted line shows the nuclear border. (H) Quantification of how *keratin-10* dynamics  
24 change over the course of 1 day. *Keratin-10* positive nuclei from day 0 were binned into “on” and  
25 “dynamic” (y-axis) and the same nuclei located on day 1. Day 1 transcriptional dynamics were  
26 quantified (x-axis) showing surprising flexibility in transcriptional dynamics over a day. (I)  
27 Chromatin compaction analysis of basal stem cells either actively transcribing *keratin-10* (green  
28 punctum in nucleus) or not transcribing *keratin-10*. Despite active transcription of the  
29 differentiation gene, there is no significant chromatin compaction remodeling at this stage. N =  
30 150 *keratin-10* “off” and 150 “on” nuclei across 3 mice. (I') PHATE and Louvain clustering of  
31 the data in (I) showing intermixed populations of *keratin-10* positive and negative basal stem cells.  
32 (J) Chromatin compaction analysis of the “on” and “dynamic” *keratin-10* transcription populations  
33 from (F) showing very little, non-significant differences between the two populations. The *keratin-*  
34 *10* “off” curve from (I) is shown as a reference in the dotted, black line N = 187 “dynamic” and  
35 124 “on” over 3 mice.  
36

## 37 **Discussion**

38 Homeostasis and function of regenerative tissues requires constant self-renewal and  
39 differentiation of resident stem cells. Stem cells undergo a relatively large reorganization of their  
40 genome through the differentiation process as their cell identity changes (Kurimoto et al., 2015;  
41 Li et al., 2017; Oudelaar et al., 2020; Paulsen et al., 2019). Current tools offer high resolution data



1 into the chromatin environment at specific loci, but rely on fixed cells and are unable to reveal  
2 how chromatin architecture is remodeled during cell identity changes such as differentiation. Here,  
3 through high-resolution imaging of H2B-GFP in live mice, we discovered chromatin compaction  
4 heterogeneity within the epidermal stem cell population under homeostatic equilibrium. This  
5 heterogeneity arises from gradual, incremental shifts in stem cell identity throughout  
6 differentiation which begin prior to exit from the stem cell layer. Moreover, by live imaging  
7 endogenous transcription of *keratin-10*, a hallmark of epidermal differentiation, we resolved  
8 highly dynamic transcriptional activity over hours and days in the absence of significant chromatin  
9 architecture changes. Ultimately, we determined that most of the global genome reorganization  
10 associated with cell identity transitions occurs between the initiation of differentiation-associated  
11 transcription and exit from the stem cell layer (delamination) (**Figure 6, model**).

12 Our ability to live image chromatin compaction in the same cells over hours and days  
13 allowed us to discover that the global chromatin compaction state of epidermal stem cells is stable  
14 over the course of hours, but remodels through the differentiation process over days. Recently,  
15 other studies which performed live imaging in cell culture systems to evaluate chromatin dynamics  
16 at finer scales, such as individual loci and Topologically Associated Domain (TAD) boundaries,  
17 have revealed that chromatin can be locally dynamic over minutes and seconds (Barth et al., 2020;  
18 Chen et al., 2018; Gabriele et al., 2022; Iida et al., 2022). These dynamic local changes to  
19 individual loci and TADs may act cumulatively toward a global and incremental shift in chromatin  
20 architecture through differentiation.

21 By visualizing chromatin compaction changes at the same time as morphological and  
22 transcriptional changes, our results add to a growing understanding that the first steps of epidermal  
23 stem cell differentiation are somewhat flexible. Recent work tracking epidermal cell fates over a



1 week showed that differentiating basal cells expressing *keratin-10* are still capable of proliferation  
2 (Cockburn et al., 2021), a behavior that was previously assumed to be unique to epidermal stem  
3 cells. Additionally, pseudo-time analysis of scRNA-sequencing data from the same study revealed  
4 a significant population of cells that contain both stem and differentiation-associated transcripts  
5 (*keratin-14* and *keratin-10*, respectively). While the dynamic nature of *keratin-10* transcription we  
6 observed within a one-hour timelapse could reflect the fact that that many genes exhibit  
7 transcriptional bursting kinetics on the scale of minutes (Dar et al., 2012; Suter et al., 2011), the  
8 observation that a portion of cells actively transcribing *keratin-10* no longer express it one day  
9 later supports the idea that individual cells remain somewhat flexible in their initial commitment  
10 to differentiation. Understanding at what point individual cells irreversibly commit to  
11 differentiation and can no longer proliferate, as well as if chromatin compaction state is also  
12 flexible during differentiation, remain interesting questions for future studies.

13 Finally, we have begun to tease apart the intimate relationship between chromatin  
14 architecture changes and transcriptional behavior *in vivo*. By combining two different genetic  
15 approaches to temporally visualize differentiation state (**Fig 4** and **Fig 5**), our results suggest that  
16 transcriptional changes happen either before or right at the beginning of global chromatin  
17 remodeling. Recent papers have supported the bi-directional and reciprocal nature of chromatin  
18 organization at individual gene loci and transcription of those loci (Lai et al., 2018; Li et al., 2021;  
19 Oudelaar et al., 2020). Through our live imaging approach, we have greatly enriched our  
20 understanding of the interplay between the highly dynamic nature of transcription and local  
21 chromatin architecture by tracking cell identity transitions in a live mammal.

22 Finally, this chromatin compaction system is not dependent on biology inherent to the skin  
23 or epidermis, and in fact is widely applicable to other systems due to the use of H2B-GFP in many

1 model systems. Additionally, this approach could be used to investigate other biological transitions  
2 in cell identity such as oncogenic initiation and expansion, and mesenchymal transitions through  
3 wound healing. There is also an opportunity to combine this more global view of chromatin  
4 architecture with higher resolution imaging modalities of individual loci or TAD boundaries. More  
5 broadly, these findings open a door into tissue-level coordination and flexibility among cells, and  
6 how the incremental and stepwise journey through differentiation establish heterogeneous cell  
7 states. We believe taking a more global view of these individual cell states, such as this tracking  
8 of pan-histone labeling, is one avenue to understand such processes.

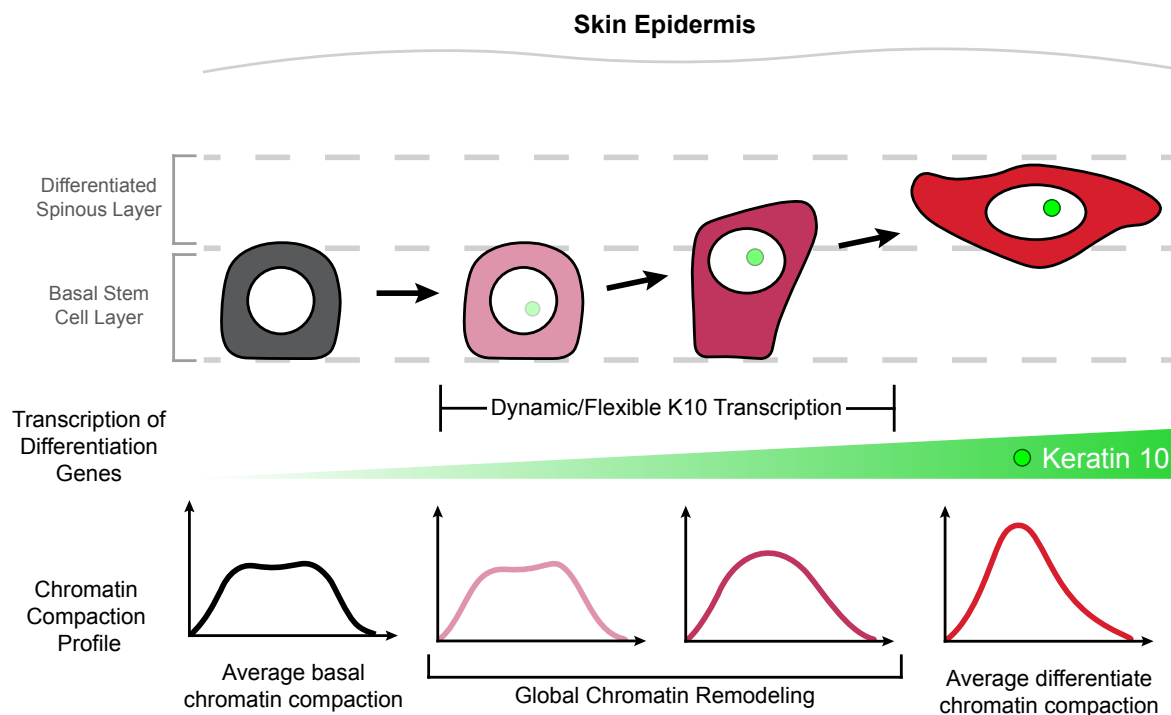

9 **Figure 6: Chromatin architecture remodeling through epidermal differentiation.** Epidermal  
10 stem cells undergo incremental changes toward differentiation over 3-4 days (top). During this  
11 process, differentiation-committed cells within the basal stem cell layer begin expressing *keratin-*  
12 *10* dynamically over hours and flexibly over days (green circle/site of transcription in nucleus).  
13 Basal stem cell and fully differentiated spinous cells have specific chromatin architecture states  
14 associated with their different cellular identities (bottom row), and global chromatin remodeling  
15 begins before delamination and exit from the basal stem cell layer.

16  
17

## 1 **Author contributions**

2  
3 DM, SY, LG, KC, and VG designed experiments and wrote the manuscript. DM, SY performed  
4 experiments. DM, SY, and DG analyzed data. DM and DG developed chromatin compaction  
5 profiling pipeline. EL performed SRF tissue sectioning. YC and SW performed PHATE and  
6 Louvain clustering analysis. BC and HZ developed statistical analysis to compare chromatin  
7 compaction histograms. SP characterized chromatin spinning phenotype after discovery.

## 8 9 **Acknowledgements**

10  
11 We thank all members of the Greco lab for critical feedback on the manuscript. We thank T.  
12 Lechler for K10-rtTA mice, E. Fuchs for K14H2B-GFP mice, K. Politi for tetO-Cre mice, as well  
13 as Vladimir Botchkarev (Boston University), Tatiana Efimova (George Washington University),  
14 Joerg Bewersdorf (Yale University), Jennifer Philips-Cremins (University of Pennsylvania),  
15 Shangqin Guo (Yale Univeristy), and Maria Kasper and Karl Annusver (Karolinska Institute) for  
16 their kind feedback at various stages of the project. We also thank the Yale Transgenic Facility for  
17 their work in generating the TIGRE-H2B-mCherry and K10MS2 mouse lines, and the Yale  
18 intravital imaging core for their continued support.

19  
20 This work is supported by an HHMI Scholar award and NIH grants number 1R01AR063663-01,  
21 1R01AR067755-01A1, 1DP1AG066590-01 and R01AR072668 (VG). SY is supported by a  
22 Medical Scientist Training Program grant from the NIH (T32GM136651), and DM is supported  
23 by the NIH-funded Training Program in Genetics (T32GM007223-44) and the Lo Stem Cell  
24 Fellowship (Yale).

## 25 26 27 28 **Methods**

### 29 30 ***In vivo* imaging**

31 All imaging was performed in non-cycling regions of the ear skin with hair removed using  
32 depilatory cream (Nair) before the start of each experiment. Mice were anesthetized using 1-2%  
33 vaporized isoflurane delivered by a nose cone throughout the course of imaging. Image stacks  
34 were acquired with a LaVision TriM Scope II (LaVision Biotec, Germany) laser scanning  
35 microscope equipped with both a Chameleon Vision II and Discovery 2-photon lasers (Coherent,  
36 USA). For collection of serial optical sections, the laser beam was focused through a 40x water  
37 immersion lens (Nikon; N.A. 1.15) and scanned with a field of view of 200x200um at 600Hz. Z-  
38 stacks were acquired with 0.5-1µm steps to image a total depth of ~40µm of tissue, covering the  
39 entire thickness of the epidermis. Visualization of ECM was achieved via second harmonic signal  
40 using blue channel at 940 nm imaging wavelength. To follow the same epidermal cells over  
41 multiple days, inherent landmarks of the skin together with a micro-tattoo were used to navigate  
42 back to the same epidermal regions every 24h. For time-lapse imaging, serial optical sections were  
43 obtained in a range of 15-30 minute intervals for a total duration of 1-3h.

44

## 1 Immunofluorescence

2 For SRF tissue-section analysis, ear skin was dissected, fixed with 4% paraformaldehyde  
3 in PBS for 1hr at room temperature and then embedded in optimal cutting temperature (OCT;  
4 Tissue Tek). Frozen OCT blocks were sectioned at 10 $\mu$ m. Primary antibodies used were guinea  
5 pig anti-K10 (1:200; Progen PG-K10) and rabbit anti-K14 (1:200; BioLegend 905301). All  
6 secondary antibodies used were raised in a donkey host and were conjugated to AlexaFluor 568 or  
7 633 (Thermofisher). Fixed tissue was mounted on a slide with Vectashield Anti-fade mounting  
8 medium (Vector Laboratories) with a #1.5 coverslip.

9 To isolate epidermis for whole mount staining, ear tissue was incubated in 5mg/ml dispase  
10 II solution (Sigma, 4942078001) at 37°C for 10 minutes and the epidermis was separated from  
11 dermis using forceps. Epidermal tissue was fixed in 4% paraformaldehyde in PBS for 45 minutes  
12 at room temperature, washed 3X in PBS, permeabilized and blocked for >1h (2% Triton-X, 5%  
13 Normal Donkey Serum, 1% BSA in PBS), incubated in primary antibody overnight at 4°C, and  
14 secondary antibodies for 3h at room temperature the next morning. Primary antibodies used were  
15 as follows: guinea pig anti-K10 (1:200; Progen GP-K10), rabbit anti-K14 (1:200; BioLegend  
16 905301) rabbit anti-H3K9me3 (1:200; Abcam ab8898), rabbit anti-nucleolin (1:200; Abcam  
17 ab22758), and rabbit anti RNA Polymerase pS2 (1:500; Abcam ab5095). All secondary antibodies  
18 used were raised in a donkey host and were conjugated to AlexaFluor 568 or 633 (Thermofisher).  
19 Fixed tissue was mounted on a slide with Vectashield Anti-fade mounting medium (Vector  
20 Laboratories) with a #1.5 coverslip.

## 21 Image analysis

22 Raw image stacks were imported into FIJI (ImageJ, NIH) or Imaris (Bitplane) for analysis.  
23 Individual optical planes or max Z-stacks of sequential optical sections were used to assemble  
24 figures. Identification of the basal stem cell and differentiated layers/cells was determined with  
25 immunofluorescent staining, positional location within the skin, and nuclear morphology. Dermal  
26 collagen was capture through second harmonic generation (SHG) of imaging and was used to  
27 confirm basal stem cells where immediately adjacent to the basement membrane.

## 28 Chromatin compaction analysis

29 Data analysis for the chromatin compaction plots was done in Imaris (Bitplane), FIJI  
30 (ImageJ), MATLAB, and Prism. We first surfaced the 3D volume of individual nuclei from high-  
31 resolution, intravital imaging data. All voxels within the 3D volume were normalized to an 8-bit  
32 range of fluorescent intensity inherent to the individual nucleus being surfaced with the top and  
33 bottom 0.1% of voxels excluded as outliers. This allowed us to compare chromatin compaction  
34 among many different nuclei and among mouse replicates and models despite slight differences in  
35 mean fluorescent intensity. Intensity values for each voxel within the 3D volume were binned into  
36 0-256 fluorescent intensity bins, and plotted as a percentage of total nuclear volume to account for  
37 differences in nuclear size.

38 To measure the chromatin compaction within loci of active transcription, we first surfaced  
39 individual nuclei and normalized voxel intensity values as described above. We then surfaced the  
40 3D volume of the transcriptionally active locus within each nucleus, applying the nuclear  
41 normalization to the voxel intensity values within the transcriptional locus. The intensity values

1 for the voxels within both the nucleus and transcriptional locus were binned and plotted as  
2 described above. Coding scripts available upon request.

### 3 Topical drug treatments

4 To pharmacologically perturb chromatin organization, Trichostatin-A (TSA) was delivered  
5 topically to the ear skin. TSA was dissolved in a 10 mg/ml stock solution in dimethyl sulfoxide  
6 (DMSO) and then diluted 100X in 100% petroleum jelly (Vaseline; final concentration 1 ug/ml).  
7 One hundred micrograms of the TSA/Vaseline mixture was spread evenly on the ear 48 and 24  
8 hours before imaging. A mixture of 100% DMSO in petroleum jelly was used as a vehicle control.

### 9 Statistics and reproducibility

10 Asterisks denote statistical significance (\*  $p < 0.05$ , \*\*  $p < 0.01$ , \*\*\*  $p < 0.001$  and \*\*\*\*  
11  $p < 0.0001$ ). Mean and standard deviation among mice are shown unless otherwise stated. Statistical  
12 calculations were performed using the Prism software package (GraphPad, USA).

13 To test statistical differences between chromatin compaction histograms, we use  
14 permutation to test the null hypothesis that the two groups have the same distribution. We define  
15 a distance between two groups of histograms. More specifically, we average histogram counts in  
16 each group and then calculate the count difference between two groups. Let  $H_k$  be the set of all  
17 histograms in group  $k$  and  $\bar{h}_{kj}$  is the average histogram count in the interval  $j$  of group  $k$ . Then  
18 the distance is defined as

$$19 \quad d(H_1, H_2) = \sum_{j=1}^J (\bar{h}_{1j} - \bar{h}_{2j})^2,$$

20 where  $J$  is the total number of intervals. Based on this definition, we first calculate the distance  
21 between the two groups from the observed data. We then perform permutations to derive the null  
22 distribution for the distance that there is no group difference. In detail, we permute the labels of  
23 the two groups, and calculate the distance for each permuted data set. This is repeated 10,000 times  
24 to derive the histogram distance distribution empirically. Lastly, the statistical significance of the  
25 observed data is calculated by the proportion of the times that the permuted data lead to a larger  
26 distance than that observed. If the  $p$  value thus estimated is less than 0.05, we conclude that the  
27 histograms of these two groups are significantly different.  
28

### 29 Mouse models

30 K14-rtTA (Xie et al., 1999), tetO-CDKN1b (Pruitt et al., 2013), tetO-Cre (Strain #:006234), and  
31 tdTomato (Madisen et al., 2010) mice were obtained from the Jackson Laboratory. K14H2B-GFP  
32 (Tumbar et al., 2004) and K14CreER (Vasioukhin et al., 1999) mice were obtained from Elaine  
33 Fuchs, Serum Response Factor (SRF) from Shangqin Guo, K10-rtTA (Muroyama and Lechler,  
34 2017) from Terry Lechler, and MCP-GFP (Lionnet et al., 2011) from Robert Singer. TIGRE-K14-  
35 H2B-mCherry mice were generated by the Yale Transgenic Facility. A K14-H2B-mCherry  
36 transgene (Mesa et al., 2015) flanked by 2X core sequence of the HS4 chicken beta globin insulator  
37 was cloned into a targeting vector (Addgene #92142) that contains homology arms of the mouse  
38 TIGRE genomic locus (Madisen et al., 2015). The resulting construct was then used to target into

1 the TIGRE locus via CRISPR/Cas9-mediated genome editing with the gRNA,  
2 ACAGAAAACATCCCAAAGTTAGG. One correctly targeted mouse was picked for generating  
3 the stable colony.

4 To block the cell cycle progression of epithelial cells during G1, K14H2B-GFP mice were  
5 mated with K14rtTA; tetO-CDKN1b mice and given doxycycline (2mg/ml) in potable water with  
6 2% sucrose. Doxycycline treatment was sustained until imaging was performed the next day.  
7 Siblings without the tetO-CDKN1b allele (K14H2B-GFP; K14rtTA) were used as controls. To  
8 generate mice deficient for SRF, K14H2B-GFP; K14CreER mice were mated to SRF<sup>fl/wt</sup>;  
9 tdTomato<sup>fl/fl</sup> mice to generate K14H2B-GFP; K14CreER; tdTomato; SRF<sup>fl/wt</sup> and SRF<sup>wt/wt</sup> mice in  
10 equal proportions. To visualize epidermal cells having initiated transcription of K10, we mated  
11 K14H2B-GFP; tetO-Cre mice to K10rtTA; tdTomato mice to yield K14H2B-GFP, K10rtTA; tetO-  
12 Cre, tdTomato mice. These mice were given doxycycline (2mg/ml) in potable water with 2%  
13 sucrose. Doxycycline treatment was sustained until imaging was performed two days later.

14 K10MS2 mice were generated by the Yale Transgenic Facility. 24X MS2 repeats (Addgene  
15 #31865) were cloned into a vector containing homology arms at the first predicted high-efficiency  
16 cut site after the stop codon for the *keratin-10* locus (26bp after stop) (Spille et al., 2019). The  
17 resulting construct was then used to target into the keratin-10 locus via CRISPR/Cas9-mediated  
18 genome editing with the gRNA, AGTGATCAGGACGATTATTGAGG. Correctly targeted  
19 founders were identified for expansion into stable colonies. Mice were born in Mendelian ratios,  
20 and heterozygous mice for the K10MS2 allele are phenotypically normal (with normal epidermal  
21 structure) which is in agreement with literature of homozygous *keratin-10* knock out mice that  
22 exhibit normal differentiation (Reichelt et al., 2001).

23 Mice from experimental and control groups were randomly selected for either sex for live  
24 imaging experiments. All procedures involving animal subjects were performed under the  
25 approval of the Institutional Animal Care and Use Committee (IACUC) of the Yale School of  
26 Medicine.

## 27 28 Tamoxifen Induction

29  
30 To recombine the SRF<sup>fl/wt</sup>/SRF<sup>wt/wt</sup>; K14CreER; tdTomato; K14H2B-GFP mice, we gave  
31 a single dose of tamoxifen (20mg/kg body weight in corn oil) by intraperitoneal injection 6 days  
32 before the final time point, immediately after imaging the day 0 timepoint.

## 33 PHATE (Potential of Heat-diffusion for Affinity-based Transition Embedding) Analysis and Cell 34 Clustering

35 MATLAB packages were used for PHATE analysis and Louvain clustering (Blondel et al.,  
36 2008; Moon et al., 2019). PHATE was performed on a matrix composed of individual cells and 27  
37 normalized fluorescent intensity bins. The number of diffusion steps was automatically picked and  
38 visualized using 2D PHATE embedding. The cells were clustered using the Louvain algorithm on  
39 the same matrix, where the algorithm searched for the 50 nearest neighbors based on Euclidean  
40 distance. Clusters were visualized on PHATE space.

41  
42  
43  
44



1 **Supplementary Figures**  
2

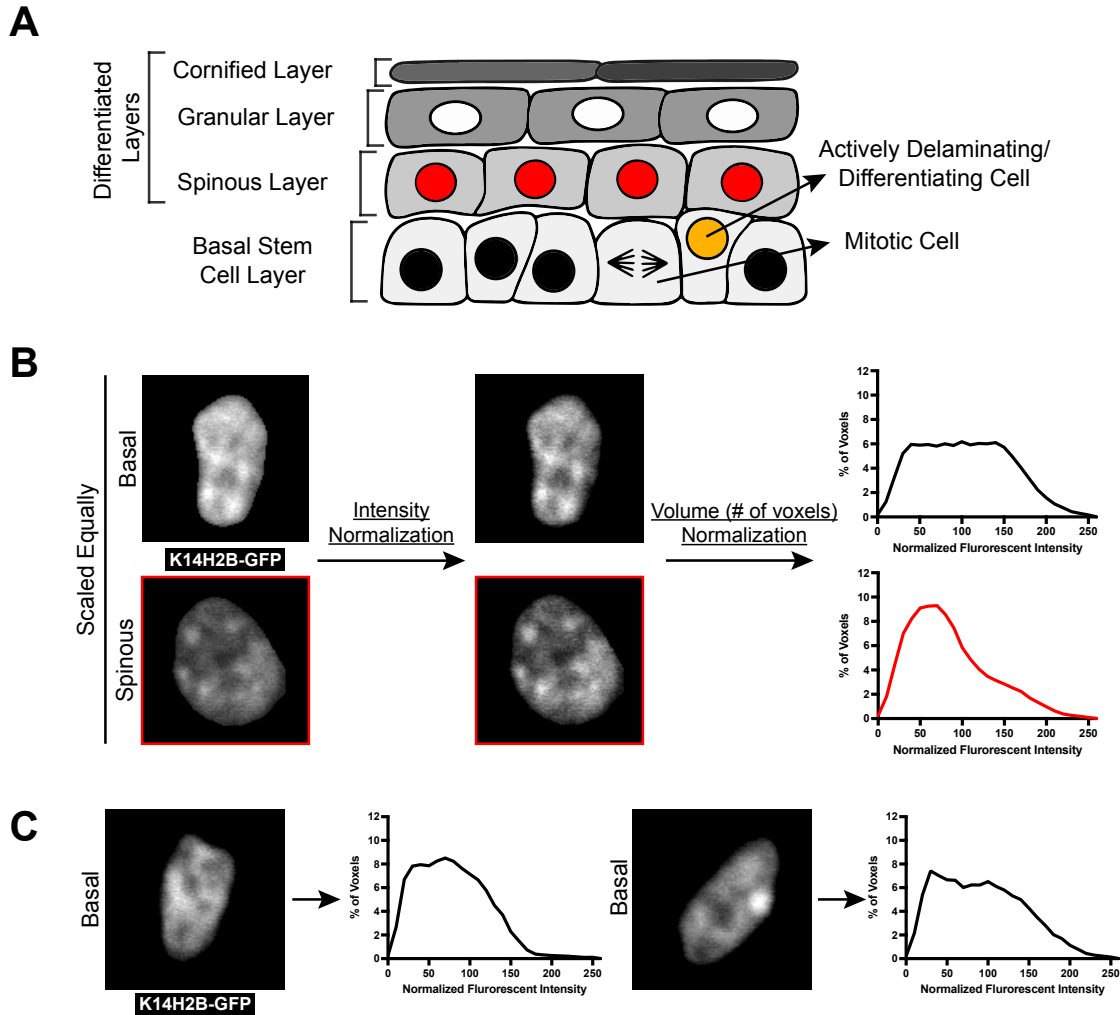

3  
4 **Supplemental Figure 1: Chromatin compaction state analysis. (A)** XZ schematic of the mouse  
5 epidermis. The basal stem cell layer (bottom) contains actively cycling cells as well as cells that  
6 have committed to differentiation and are actively leaving the layer. Cells differentiate apically  
7 until they eventually die and form the most outer barrier to the epidermis. **(B)** Quantitative  
8 workflow of the chromatin compaction analysis from imaging data (methods). Individual nuclei  
9 (left) are surfaced in 3D, exported as raw voxel data, normalized for mean intensity and plotted as  
10 a voxel percentage of total nuclear volume. These normalized voxels can then be exported back as  
11 scaled, intensity-based images (right). **(C)** Two individual basal nuclei are shown with their  
12 corresponding chromatin compaction histograms.

13  
14  
15  
16  
17



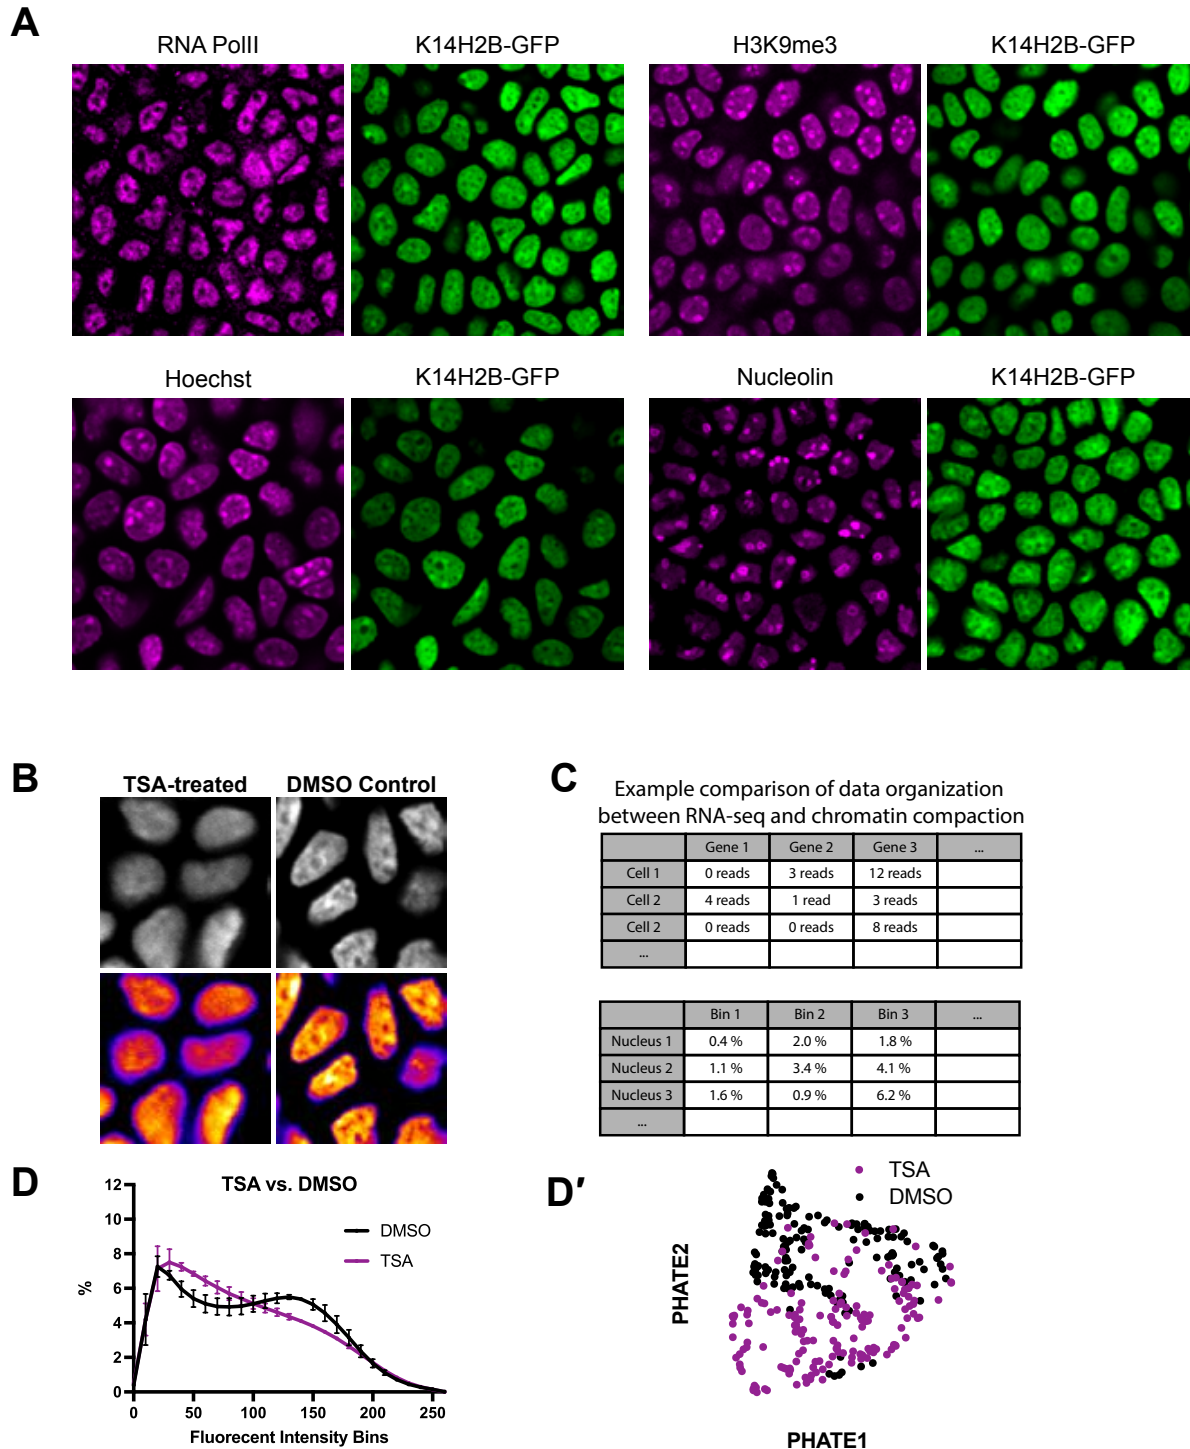

1 **Supplemental Figure 2: Organization of H2B-GFP allele.** (A) Representative crops of fixed  
2 tissue, single channel stainings of the basal stem cell layer. Genetically encoded K14H2B-GFP  
3 signal is shown in green, and immunofluorescent stainings in magenta. (B) Representative regions  
4 of TSA-treated (left) and DMSO vehicle control (right) mice showing clear disruption of  
5 chromatin distribution. K14H2B-GFP intensity seen in greyscale (top) and in the FIRE LUT  
6 (bottom). (C) Comparison of mock data between scRNA-sequencing data typically applied to the

1 PHATE/Louvain clustering algorithm, and the imaging-based voxel intensity data used. **(D)**  
2 Chromatin compaction analysis for TSA-treated and DMSO control nuclei showing altered  
3 chromatin compaction state in the TSA-treated mice. N = 150 basal stem cell layer nuclei across  
4 3 mice. **(D')** PHATE representation of data from (E) showing largely separated clusters of TSA  
5 and DMSO-treated mice.  
6

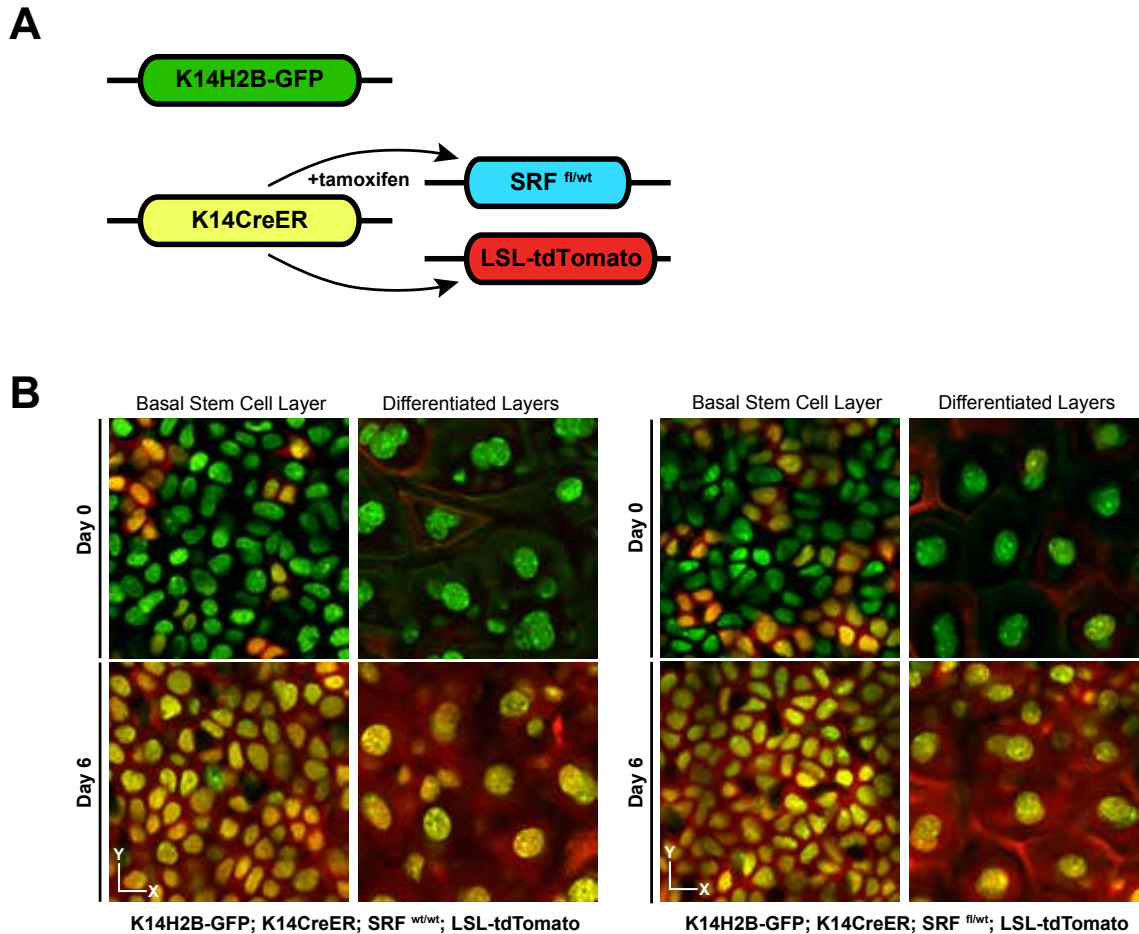

7  
8  
9  
10  
11  
12  
13  
14  
15  
16  
17  
18  
19

### Supplemental Figure 3: Genetic ablation of SRF allele in the basal stem cell layer

**(A)** Schematic of the inducible genetic system used in figure 2 to recombine and knock down SRF.  
**(B)** Representative crops from the basal stem cell and differentiated layers on days 0 and 6 in wild-type (top) and SRF heterozygous (bottom) mice. LSL-tdTomato acts as a readout of recombination.

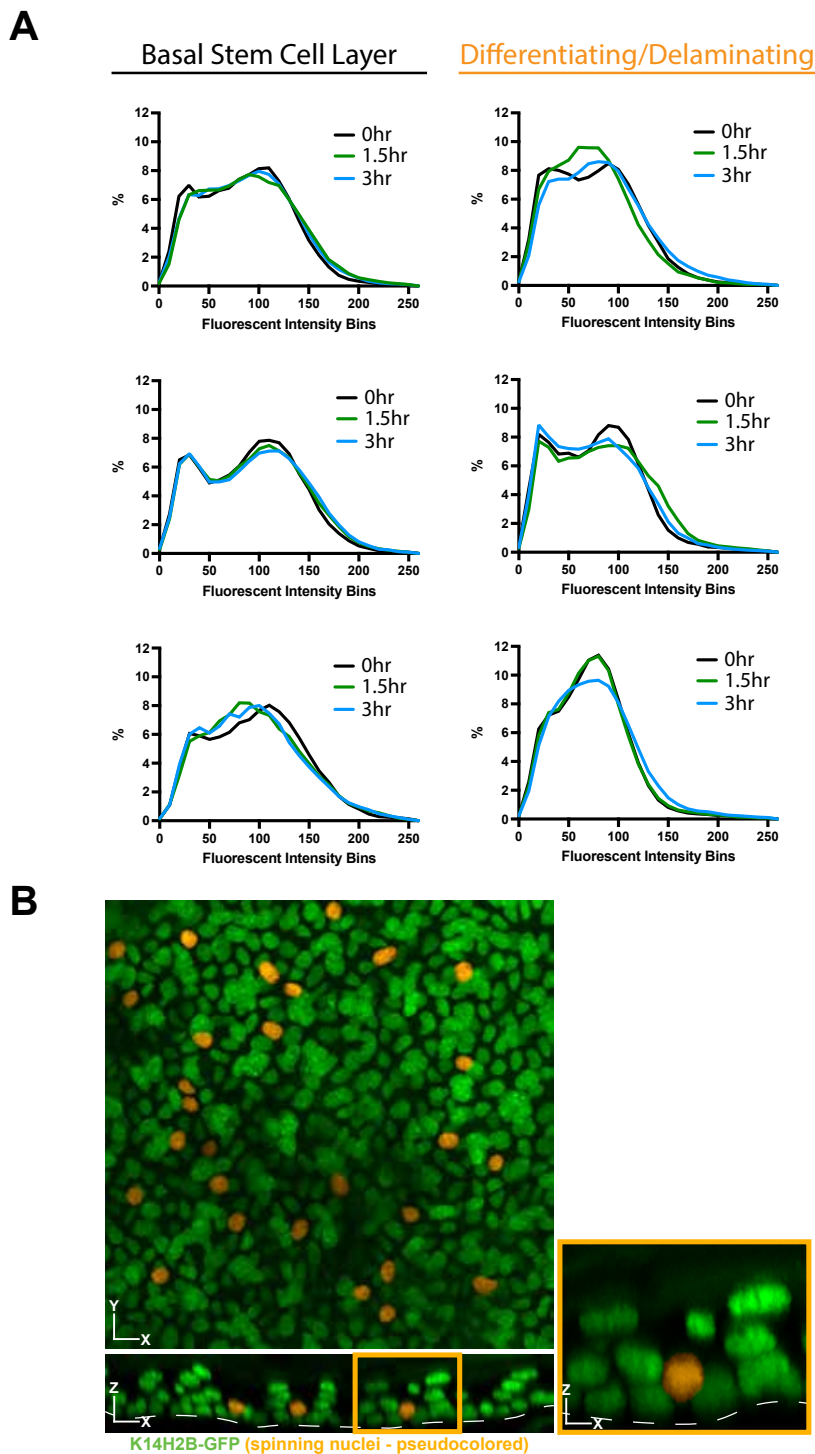

1  
2 **Supplemental Figure 4: Single cell chromatin compaction dynamics over hours. (A)**  
3 Individual nucleus chromatin compaction profiles from 3 basal stem cell and 3  
4 delaminating/spinning cells at 0-, 1.5-, and 3-hour time points showing little change over this  
5 scale. **(B)** Representative XY (top) and XZ (bottom) max projection FOV of the epidermis  
6 (K14H2B-GFP in green) with spinning chromatin cells pseudocolored in orange.

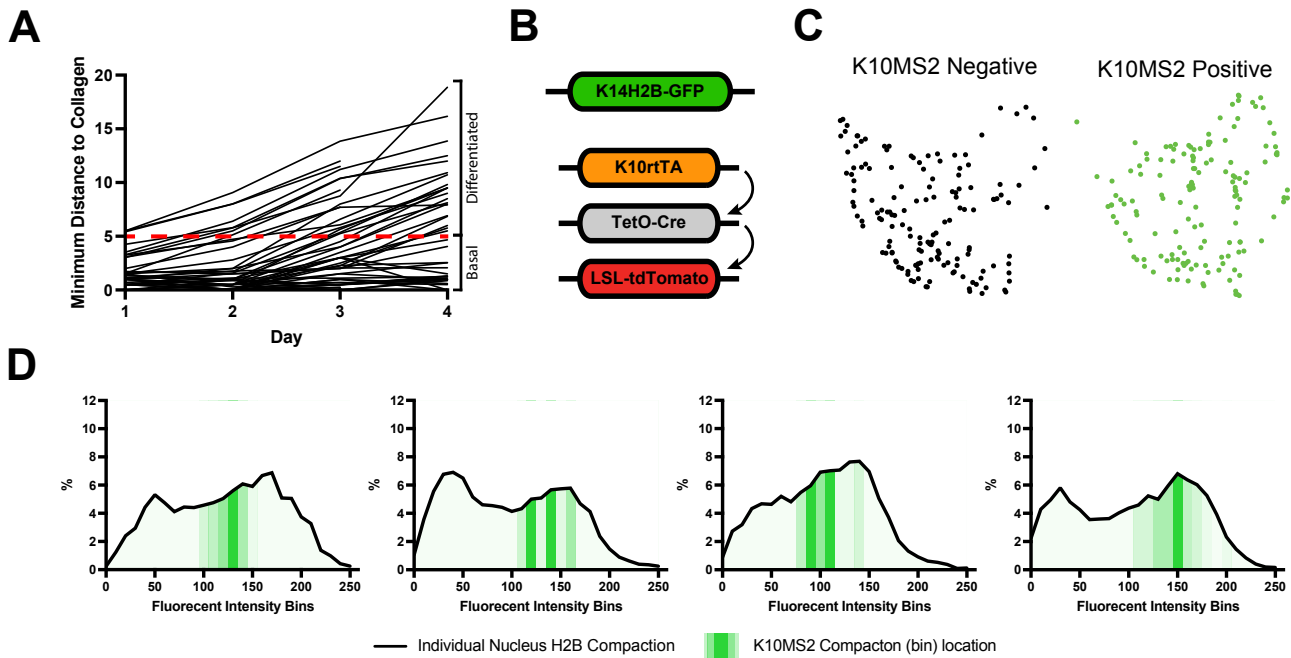

1 **Supplemental Figure 5: Imaging differentiation-associated cell identity.** (A) Individual  
 2 tracking of cells from figure 3D showing trajectory of minimum distance from collagen over 4  
 3 days. (B) Schematic of the inducible genetic system used in figure 4 to visualize cells within the  
 4 basal stem cell layer that have started expressing *keratin-10*. (C) PHATE representation from  
 5 figure 5I' separated by cell status (*keratin-10* “on” or “off”). While largely intermixed, there  
 6 appears a slight preference (though non-significant) for one side of the PHATE cluster vs. the other  
 7 (“off” to the left, “on” to the right). (D) Individual nuclear chromatin compaction profiles for four  
 8 basal stem cell layer nuclei. K14H2B-mCherry compaction profile shown by black line, and the  
 9 MCP/MS2 *keratin-10* transcription regions in green translucency.

10

## 11 **Movie Legends**

12

### 13 **Movie 1: Chromatin compaction**

14

15 A single basal stem cell layer nucleus crop visualizing H2B-GFP intensity. The movie first scans  
 16 through the greyscale, intensity image (white), then through the FIRE LUT intensities shown in  
 17 figure 1B, then the three different binned intensities seen in figure 1B and 1C. Nuclear outline is  
 18 denoted by the white dotted line.

19

### 20 **Movie 2: Spinning chromatin**

21

22 An XY field-of-view of the upper, basal stem cell layer in which chromatin (H2B-GFP) can be  
 23 observed to spin. Timelapse is 3 hours long and looped 3 times.

24

25

26

27

## 1 **References**

- 2
- 3 Amiad-Pavlov, D., Lorber, D., Bajpai, G., Reuveny, A., Roncato, F., Alon, R., Safran, S., and  
4 Volk, T. (2021). Live imaging of chromatin distribution reveals novel principles of nuclear  
5 architecture and chromatin compartmentalization. *Sci. Adv.* *7*, eabf6251.  
6 <https://doi.org/10.1126/sciadv.abf6251>.
- 7 Aragona, M., Sifrim, A., Malfait, M., Song, Y., Van Herck, J., Dekoninck, S., Gargouri, S.,  
8 Lapouge, G., Swedlund, B., Dubois, C., et al. (2020). Mechanisms of stretch-mediated skin  
9 expansion at single-cell resolution. *Nature* *584*, 268–273. [https://doi.org/10.1038/s41586-020-](https://doi.org/10.1038/s41586-020-2555-7)  
10 [2555-7](https://doi.org/10.1038/s41586-020-2555-7).
- 11 Barth, R., Bystricky, K., and Shaban, H.A. (2020). Coupling chromatin structure and dynamics  
12 by live super-resolution imaging. *Sci. Adv.* *6*, eaaz2196. <https://doi.org/10.1126/sciadv.aaz2196>.
- 13 Blondel, V.D., Guillaume, J.-L., Lambiotte, R., and Lefebvre, E. (2008). Fast unfolding of  
14 communities in large networks. *J. Stat. Mech.* *2008*, P10008. [https://doi.org/10.1088/1742-](https://doi.org/10.1088/1742-5468/2008/10/P10008)  
15 [5468/2008/10/P10008](https://doi.org/10.1088/1742-5468/2008/10/P10008).
- 16 Bothma, J.P., Garcia, H.G., Esposito, E., Schlissel, G., Gregor, T., and Levine, M. (2014).  
17 Dynamic regulation of *eve* stripe 2 expression reveals transcriptional bursts in living *Drosophila*  
18 embryos. *Proc. Natl. Acad. Sci. U.S.A.* *111*, 10598–10603.  
19 <https://doi.org/10.1073/pnas.1410022111>.
- 20 Braun, K.M., Niemann, C., Jensen, U.B., Sundberg, J.P., Silva-Vargas, V., and Watt, F.M.  
21 (2003). Manipulation of stem cell proliferation and lineage commitment: visualisation of label-  
22 retaining cells in whole mounts of mouse epidermis. *Development* *130*, 5241–5255.  
23 <https://doi.org/10.1242/dev.00703>.
- 24 Buenrostro, J.D., Wu, B., Litzenburger, U.M., Ruff, D., Gonzales, M.L., Snyder, M.P., Chang,  
25 H.Y., and Greenleaf, W.J. (2015). Single-cell chromatin accessibility reveals principles of  
26 regulatory variation. *Nature* *523*, 486–490. <https://doi.org/10.1038/nature14590>.
- 27 Chen, H., Levo, M., Barinov, L., Fujioka, M., Jaynes, J.B., and Gregor, T. (2018). Dynamic  
28 interplay between enhancer–promoter topology and gene activity. *Nat Genet* *50*, 1296–1303.  
29 <https://doi.org/10.1038/s41588-018-0175-z>.
- 30 Chubb, J.R., Treck, T., Shenoy, S.M., and Singer, R.H. (2006). Transcriptional Pulsing of a  
31 Developmental Gene. *Current Biology* *16*, 1018–1025.  
32 <https://doi.org/10.1016/j.cub.2006.03.092>.
- 33 Cockburn, K., Annusver, K., Ganesan, S., Mesa, K.R., Kawaguchi, K., Kasper, M., and Greco,  
34 V. (2021). Gradual differentiation uncoupled from cell cycle exit generates heterogeneity in the  
35 epidermal stem cell layer. *2021.01.07.425777*. <https://doi.org/10.1101/2021.01.07.425777>.
- 36 Dar, R.D., Razoooky, B.S., Singh, A., Trimeloni, T.V., McCollum, J.M., Cox, C.D., Simpson,  
37 M.L., and Weinberger, L.S. (2012). Transcriptional burst frequency and burst size are equally



- 1 modulated across the human genome. *Proc. Natl. Acad. Sci. U.S.A.* *109*, 17454–17459.  
2 <https://doi.org/10.1073/pnas.1213530109>.
- 3 Doupé, D.P., Klein, A.M., Simons, B.D., and Jones, P.H. (2010). The Ordered Architecture of  
4 Murine Ear Epidermis Is Maintained by Progenitor Cells with Random Fate. *Developmental Cell*  
5 *18*, 317–323. <https://doi.org/10.1016/j.devcel.2009.12.016>.
- 6 Fan, X., Wang, D., Burgmaier, J.E., Teng, Y., Romano, R.-A., Sinha, S., and Yi, R. (2018).  
7 Single Cell and Open Chromatin Analysis Reveals Molecular Origin of Epidermal Cells of the  
8 Skin. *Developmental Cell* *47*, 21-37.e5. <https://doi.org/10.1016/j.devcel.2018.08.010>.
- 9 Finn, E.H., Pegoraro, G., Brandão, H.B., Valton, A.-L., Oomen, M.E., Dekker, J., Mirny, L., and  
10 Misteli, T. (2019). Extensive Heterogeneity and Intrinsic Variation in Spatial Genome  
11 Organization. *Cell* *176*, 1502-1515.e10. <https://doi.org/10.1016/j.cell.2019.01.020>.
- 12 Fritsch, C., Baumgärtner, S., Kuban, M., Steinshorn, D., Reid, G., and Legewie, S. (2018).  
13 Estrogen-dependent control and cell-to-cell variability of transcriptional bursting. *Mol Syst Biol*  
14 *14*. <https://doi.org/10.15252/msb.20177678>.
- 15 Gabriele, M., Brandão, H.B., Grosse-Holz, S., Jha, A., Dailey, G.M., Cattoglio, C., Hsieh, T.-  
16 H.S., Mirny, L., Zechner, C., and Hansen, A.S. (2022). Dynamics of CTCF- and cohesin-  
17 mediated chromatin looping revealed by live-cell imaging. *Science* *376*, 496–501.  
18 <https://doi.org/10.1126/science.abn6583>.
- 19 Gdula, M.R., Poterlowicz, K., Mardaryev, A.N., Sharov, A.A., Peng, Y., Fessing, M.Y., and  
20 Botchkarev, V.A. (2013). Remodeling of Three-Dimensional Organization of the Nucleus during  
21 Terminal Keratinocyte Differentiation in the Epidermis. *Journal of Investigative Dermatology*  
22 *133*, 2191–2201. <https://doi.org/10.1038/jid.2013.66>.
- 23 Golkaram, M., Jang, J., Hellander, S., Kosik, K.S., and Petzold, L.R. (2017). The Role of  
24 Chromatin Density in Cell Population Heterogeneity during Stem Cell Differentiation. *Sci Rep* *7*,  
25 13307. <https://doi.org/10.1038/s41598-017-13731-3>.
- 26 Hiratsuka, T., Fujita, Y., Naoki, H., Aoki, K., Kamioka, Y., and Matsuda, M. (2015).  
27 Intercellular propagation of extracellular signal-regulated kinase activation revealed by in vivo  
28 imaging of mouse skin. *ELife* *4*, e05178. <https://doi.org/10.7554/eLife.05178>.
- 29 Iida, S., Shinkai, S., Itoh, Y., Tamura, S., Kanemaki, M.T., Onami, S., and Maeshima, K. (2022).  
30 Single-nucleosome imaging reveals steady-state motion of interphase chromatin in living human  
31 cells. *Sci. Adv.* *8*, eabn5626. <https://doi.org/10.1126/sciadv.abn5626>.
- 32 Jin, W., Tang, Q., Wan, M., Cui, K., Zhang, Y., Ren, G., Ni, B., Sklar, J., Przytycka, T.M.,  
33 Childs, R., et al. (2015). Genome-wide detection of DNase I hypersensitive sites in single cells  
34 and FFPE tissue samples. *Nature* *528*, 142–146. <https://doi.org/10.1038/nature15740>.
- 35 Kanda, T., Sullivan, K.F., and Wahl, G.M. (1998). Histone–GFP fusion protein enables sensitive  
36 analysis of chromosome dynamics in living mammalian cells. *Current Biology* *8*, 377–385.  
37 [https://doi.org/10.1016/S0960-9822\(98\)70156-3](https://doi.org/10.1016/S0960-9822(98)70156-3).

- 1 Kurimoto, K., Yabuta, Y., Hayashi, K., Ohta, H., Kiyonari, H., Mitani, T., Moritoki, Y., Kohri,  
2 K., Kimura, H., Yamamoto, T., et al. (2015). Quantitative Dynamics of Chromatin Remodeling  
3 during Germ Cell Specification from Mouse Embryonic Stem Cells. *Cell Stem Cell* 16, 517–532.  
4 <https://doi.org/10.1016/j.stem.2015.03.002>.
- 5 Lai, B., Gao, W., Cui, K., Xie, W., Tang, Q., Jin, W., Hu, G., Ni, B., and Zhao, K. (2018).  
6 Principles of nucleosome organization revealed by single-cell micrococcal nuclease sequencing.  
7 *Nature* 562, 281–285. <https://doi.org/10.1038/s41586-018-0567-3>.
- 8 Li, D., Liu, J., Yang, X., Zhou, C., Guo, J., Wu, C., Qin, Y., Guo, L., He, J., Yu, S., et al. (2017).  
9 Chromatin Accessibility Dynamics during iPSC Reprogramming. *Cell Stem Cell* 21, 819–833.e6.  
10 <https://doi.org/10.1016/j.stem.2017.10.012>.
- 11 Li, Y., Eshein, A., Virk, R.K.A., Eid, A., Wu, W., Frederick, J., VanDerway, D., Gladstein, S.,  
12 Huang, K., Shim, A.R., et al. (2021). Nanoscale chromatin imaging and analysis platform  
13 bridges 4D chromatin organization with molecular function. *Sci. Adv.* 7, eabe4310.  
14 <https://doi.org/10.1126/sciadv.abe4310>.
- 15 Lin, C., Hindes, A., Burns, C.J., Koppel, A.C., Kiss, A., Yin, Y., Ma, L., Blumenberg, M.,  
16 Khnykin, D., Jahnsen, F.L., et al. (2013). Serum response factor controls transcriptional network  
17 regulating epidermal function and hair follicle morphogenesis. *J Invest Dermatol* 133, 608–617.  
18 <https://doi.org/10.1038/jid.2012.378>.
- 19 Lionnet, T., Czaplinski, K., Darzacq, X., Shav-Tal, Y., Wells, A.L., Chao, J.A., Park, H.Y., de  
20 Turris, V., Lopez-Jones, M., and Singer, R.H. (2011). A transgenic mouse for in vivo detection  
21 of endogenous labeled mRNA. *Nat Methods* 8, 165–170. <https://doi.org/10.1038/nmeth.1551>.
- 22 Madisen, L., Zwingman, T.A., Sunkin, S.M., Oh, S.W., Zariwala, H.A., Gu, H., Ng, L.L.,  
23 Palmiter, R.D., Hawrylycz, M.J., Jones, A.R., et al. (2010). A robust and high-throughput Cre  
24 reporting and characterization system for the whole mouse brain. *Nat Neurosci* 13, 133–140.  
25 <https://doi.org/10.1038/nn.2467>.
- 26 Madisen, L., Garner, A.R., Shimaoka, D., Chuong, A.S., Klapoetke, N.C., Li, L., van der Bourg,  
27 A., Niino, Y., Egolf, L., Monetti, C., et al. (2015). Transgenic Mice for Intersectional Targeting  
28 of Neural Sensors and Effectors with High Specificity and Performance. *Neuron* 85, 942–958.  
29 <https://doi.org/10.1016/j.neuron.2015.02.022>.
- 30 Mardaryev, A.N., Gdula, M.R., Yarker, J.L., Emelianov, V.U., Poterlowicz, K., Sharov, A.A.,  
31 Sharova, T.Y., Scarpa, J.A., Joffe, B., Solovei, I., et al. (2014). p63 and Brg1 control  
32 developmentally regulated higher-order chromatin remodelling at the epidermal differentiation  
33 complex locus in epidermal progenitor cells. *Development* 141, 3437–3437.  
34 <https://doi.org/10.1242/dev.115725>.
- 35 Mesa, K.R., Rompolas, P., Zito, G., Myung, P., Sun, T.Y., Brown, S., Gonzalez, D.G., Blagoev,  
36 K.B., Haberman, A.M., and Greco, V. (2015). Niche-induced cell death and epithelial  
37 phagocytosis regulate hair follicle stem cell pool. *Nature* 522, 94–97.  
38 <https://doi.org/10.1038/nature14306>.



- 1 Mesa, K.R., Kawaguchi, K., Cockburn, K., Gonzalez, D., Boucher, J., Xin, T., Klein, A.M., and  
2 Greco, V. (2018). Homeostatic Epidermal Stem Cell Self-Renewal Is Driven by Local  
3 Differentiation. *Cell Stem Cell* 23, 677-686.e4. <https://doi.org/10.1016/j.stem.2018.09.005>.
- 4 Moon, K.R., van Dijk, D., Wang, Z., Gigante, S., Burkhardt, D.B., Chen, W.S., Yim, K., Elzen,  
5 A. van den, Hirn, M.J., Coifman, R.R., et al. (2019). Visualizing structure and transitions in  
6 high-dimensional biological data. *Nat Biotechnol* 37, 1482–1492.  
7 <https://doi.org/10.1038/s41587-019-0336-3>.
- 8 Muroyama, A., and Lechler, T. (2017). A transgenic toolkit for visualizing and perturbing  
9 microtubules reveals unexpected functions in the epidermis. *ELife* 6, e29834.  
10 <https://doi.org/10.7554/eLife.29834>.
- 11 Oudelaar, A.M., Beagrie, R.A., Gosden, M., de Ornellas, S., Georgiades, E., Kerry, J., Hidalgo,  
12 D., Carrelha, J., Shivalingam, A., El-Sagheer, A.H., et al. (2020). Dynamics of the 4D genome  
13 during in vivo lineage specification and differentiation. *Nat Commun* 11, 2722.  
14 <https://doi.org/10.1038/s41467-020-16598-7>.
- 15 Patel, A.P., Tirosh, I., Trombetta, J.J., Shalek, A.K., Gillespie, S.M., Wakimoto, H., Cahill, D.P.,  
16 Nahed, B.V., Curry, W.T., Martuza, R.L., et al. (2014). Single-cell RNA-seq highlights  
17 intratumoral heterogeneity in primary glioblastoma. *Science* 344, 1396–1401.  
18 <https://doi.org/10.1126/science.1254257>.
- 19 Paulsen, J., Liyakat Ali, T.M., Nekrasov, M., Delbarre, E., Baudement, M.-O., Kurscheid, S.,  
20 Tremethick, D., and Collas, P. (2019). Long-range interactions between topologically associating  
21 domains shape the four-dimensional genome during differentiation. *Nat Genet* 51, 835–843.  
22 <https://doi.org/10.1038/s41588-019-0392-0>.
- 23 Pelham-Webb, B., Murphy, D., and Apostolou, E. (2020). Dynamic 3D Chromatin  
24 Reorganization during Establishment and Maintenance of Pluripotency. *Stem Cell Reports* 15,  
25 1176–1195. <https://doi.org/10.1016/j.stemcr.2020.10.012>.
- 26 Pruitt, S.C., Freeland, A., Rusiniak, M.E., Kunnev, D., and Cady, G.K. (2013). *Cdkn1b*  
27 overexpression in adult mice alters the balance between genome and tissue ageing. *Nat Commun*  
28 4, 2626. <https://doi.org/10.1038/ncomms3626>.
- 29 Reichelt, J., Büssow, H., Grund, C., and Magin, T.M. (2001). Formation of a normal epidermis  
30 supported by increased stability of keratins 5 and 14 in keratin 10 null mice. *Mol Biol Cell* 12,  
31 1557–1568. <https://doi.org/10.1091/mbc.12.6.1557>.
- 32 Schweizer, J., Kinjo, M., Fürstenberger, G., and Winter, H. (1984). Sequential expression of  
33 mRNA-encoded keratin sets in neonatal mouse epidermis: Basal cells with properties of  
34 terminally differentiating cells. *Cell* 37, 159–170. [https://doi.org/10.1016/0092-8674\(84\)90311-](https://doi.org/10.1016/0092-8674(84)90311-8)  
35 8.
- 36 Shue, Y.T., Lee, K.T., Walters, B.W., Ong, H.B., Silvaraju, S., Lam, W.J., and Lim, C.Y. (2020).  
37 Dynamic shifts in chromatin states differentially mark the proliferative basal cells and terminally

- 1 differentiated cells of the developing epidermis. *Epigenetics* *15*, 932–948.  
2 <https://doi.org/10.1080/15592294.2020.1738028>.
- 3 Spille, J.-H., Hecht, M., Grube, V., Cho, W., Lee, C., and Cissé, I.I. (2019). A CRISPR/Cas9  
4 platform for MS2-labelling of single mRNA in live stem cells. *Methods* *153*, 35–45.  
5 <https://doi.org/10.1016/j.ymeth.2018.09.004>.
- 6 Suter, D.M., Molina, N., Gatfield, D., Schneider, K., Schibler, U., and Naef, F. (2011).  
7 Mammalian Genes Are Transcribed with Widely Different Bursting Kinetics. *Science* *332*, 472–  
8 474. <https://doi.org/10.1126/science.1198817>.
- 9 Tumber, T., Guasch, G., Greco, V., Blanpain, C., Lowry, W.E., Rendl, M., and Fuchs, E. (2004).  
10 Defining the epithelial stem cell niche in skin. *Science* *303*, 359–363.  
11 <https://doi.org/10.1126/science.1092436>.
- 12 Vasioukhin, V., Degenstein, L., Wise, B., and Fuchs, E. (1999). The magical touch: Genome  
13 targeting in epidermal stem cells induced by tamoxifen application to mouse skin. *Proc. Natl.*  
14 *Acad. Sci. U.S.A.* *96*, 8551–8556. <https://doi.org/10.1073/pnas.96.15.8551>.
- 15 Verdoni, A.M., Ikeda, S., and Ikeda, A. (2010). Serum response factor is essential for the proper  
16 development of skin epithelium. *Mamm Genome* *21*, 64–76. [https://doi.org/10.1007/s00335-009-](https://doi.org/10.1007/s00335-009-9245-y)  
17 [9245-y](https://doi.org/10.1007/s00335-009-9245-y).
- 18 Wang, S., Drummond, M.L., Guerrero-Juarez, C.F., Tarapore, E., MacLean, A.L., Stabell, A.R.,  
19 Wu, S.C., Gutierrez, G., That, B.T., Benavente, C.A., et al. (2020). Single cell transcriptomics of  
20 human epidermis identifies basal stem cell transition states. *Nat Commun* *11*, 4239.  
21 <https://doi.org/10.1038/s41467-020-18075-7>.
- 22 Xie, W., Chow, L.T., Paterson, A.J., Chin, E., and Kudlow, J.E. (1999). Conditional expression  
23 of the ErbB2 oncogene elicits reversible hyperplasia in stratified epithelia and up-regulation of  
24 TGF $\alpha$  expression in transgenic mice. *Oncogene* *18*, 3593–3607.  
25 <https://doi.org/10.1038/sj.onc.1202673>.
- 26
